RESEARCH ARTICLE

# Asymmetric and Symmetric Dimethylarginine as Risk Markers for Total Mortality and Cardiovascular Outcomes: A Systematic Review and Meta-Analysis of Prospective Studies

Sabrina Schlesinger<sup>1\*</sup>, Svenja R. Sonntag<sup>1</sup>, Wolfgang Lieb<sup>1☉</sup>, Renke Maas<sup>2☉\*</sup>

**1** Institute of Epidemiology, Christian-Albrechts University of Kiel, Kiel, Germany, **2** Institute of Experimental and Clinical Pharmacology and Toxicology, Friedrich-Alexander-Universität Erlangen-Nürnberg, Erlangen, Germany

☉ These authors contributed equally to this work.

\* [sabrina.schlesinger@epi.uni-kiel.de](mailto:sabrina.schlesinger@epi.uni-kiel.de) (SS); [Renke.Maas@pharmakologie.uni-erlangen.de](mailto:Renke.Maas@pharmakologie.uni-erlangen.de) (RM)

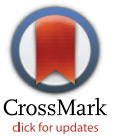

**OPEN ACCESS**

**Citation:** Schlesinger S, Sonntag SR, Lieb W, Maas R (2016) Asymmetric and Symmetric Dimethylarginine as Risk Markers for Total Mortality and Cardiovascular Outcomes: A Systematic Review and Meta-Analysis of Prospective Studies. *PLoS ONE* 11(11): e0165811. doi:10.1371/journal.pone.0165811

**Editor:** Tatsuo Shimosawa, The University of Tokyo, JAPAN

**Received:** May 31, 2016

**Accepted:** October 18, 2016

**Published:** November 3, 2016

**Copyright:** © 2016 Schlesinger et al. This is an open access article distributed under the terms of the [Creative Commons Attribution License](https://creativecommons.org/licenses/by/4.0/), which permits unrestricted use, distribution, and reproduction in any medium, provided the original author and source are credited.

**Data Availability Statement:** All relevant data are within the paper and its Supporting Information files.

**Funding:** This work was supported by a grant from the German Research Foundation (DFG Excellence Cluster Inflammation at Interfaces EXC306/2).

**Competing Interests:** The author RM was named as a co-inventor on the patent "Method for determination of arginine, methylated arginines and derivatives thereof." EP1666884 A1/B1, US

## Abstract

### Background

A growing number of studies linked elevated concentrations of circulating asymmetric (ADMA) and symmetric (SDMA) dimethylarginine to mortality and cardiovascular disease (CVD) events. To summarize the evidence, we conducted a systematic review and quantified associations of ADMA and SDMA with the risks of all-cause mortality and incident CVD in meta-analyses accounting for different populations and methodological approaches of the studies.

### Methods

Relevant studies were identified in PubMed until February 2015. We used random effect models to obtain summary relative risks (RR) and 95% confidence intervals (95% CIs), comparing top versus bottom tertiles. Dose-response relations were assessed by restricted cubic spline regression models and potential non-linearity was evaluated using a likelihood ratio test. Heterogeneity between subgroups was assessed by meta-regression analysis.

### Results

For ADMA, 34 studies (total n = 32,428) investigating associations with all-cause mortality (events = 5,035) and 30 studies (total n = 30,624) investigating the association with incident CVD (events = 3,396) were included. The summary RRs (95%CI) for all-cause mortality were 1.52 (1.37–1.68) and for CVD 1.33 (1.22–1.45), comparing high versus low ADMA concentrations. Slight differences were observed across study populations and methodological approaches, with the strongest association of ADMA being reported with all-cause mortality in critically ill patients. For SDMA, 17 studies (total n = 18,163) were included for

2006094122, DE602004020360 D1. The patent was owned and later transferred to a third party by his previous employer. The author does not work for the previous or current owner of the patent and receives no royalties or consulting fees from it and does not pursue any activity in relation to the patent.

**Abbreviations:** ADMA, Asymmetric dimethylarginine; AGXT2, alanine—glyoxylate aminotransferase 2; CVD, Cardiovascular disease; DDAH, dimethylarginine dimethylaminohydrolase; ELISA, Enzyme Linked Immunosorbent Assay; eNOS, endothelial nitric-oxide synthase; F, female; HDL, high density lipoprotein; HPLC, High-performance liquid chromatography; HR, Hazard ratio; iNOS, inducible nitric-oxide synthase; M, male; MACE, major adverse cardiac event; NF- $\kappa$ B, nuclear factor kappa-light-chain-enhancer of activated B cells; nNOS, neuronal nitric oxide synthase; NO, Nitric oxide; OR, Odds ratio; PRMT, protein arginine N-methyltransferase; ROS, reactive oxygen species; RR, Relative risk; SD, Standard deviation; SDMA, Symmetric dimethylarginine.

all-cause mortality (events = 2,903), and 13 studies (total n = 16,807) for CVD (events = 1,534). High vs. low levels of SDMA, were associated with increased risk of all-cause mortality [summary RR (95%CI): 1.31 (1.18–1.46)] and CVD [summary RR (95%CI): 1.36 (1.10–1.68)] Strongest associations were observed in general population samples.

## Conclusions

The dimethylarginines ADMA and SDMA are independent risk markers for all-cause mortality and CVD across different populations and methodological approaches.

## Introduction

Asymmetric (ADMA) and symmetric (SDMA) dimethylarginine are both di-methylarginines that are structurally related to L-Arginine and, therefore, may interfere with L-Arginine-related signaling. Both share transport mechanisms of L-Arginine,[1] but likely differ in their functional effects on nitric oxide (NO) synthesis. Whereas ADMA is an established competitive inhibitor of the NO Synthase,[2] SDMA has no or only little effect on NO-synthesis.[3] Particularly for ADMA, experimental and clinical data support a role in vascular remodeling,[4] [5] e.g. by demonstrating that vascular function and the degree of atherosclerosis correlated with ADMA levels in animal models.[5] On a parallel note, administration of ADMA in humans lead to reduced cardiac output and renal plasma flow and to increased vascular resistance.[6] Due to their biological functions, both markers have been explored as cardiovascular biomarkers.

Since the landmark studies by Zocalli et al.[7] and Valokonen et al.[8] in 2001, multiple studies have linked circulating ADMA concentrations to cardiovascular disease (CVD) risk and mortality and many reported positive associations.[9–11] However some conflicting results were observed; for example in the Framingham Offspring Study, ADMA was positively related to all-cause mortality, but not to incident CVD.[12] With respect to SDMA, initial studies did not find an association with adverse outcomes,[7, 13, 14] but some more recent studies reported positive associations with all-cause mortality or CVD.[11, 15, 16] Overall, prior studies on ADMA/SDMA and CVD or all-cause mortality were derived from many different study populations (general population,[15, 17, 18] patients with CVD,[9, 11, 19, 20] renal diseases,[7, 13, 21–24] diabetes,[25, 26] or critically ill patients from intensive care unit,[27–29] respectively), differed in their methodological approaches (e.g. using types of samples (plasma vs. serum) or methods to determine the biomarker levels (HPLC vs. tandem mass spectroscopy vs. ELISA), or considered different confounders in their analysis.

A recent meta-analysis strengthened the notion that ADMA is an independent risk marker for cardiovascular events but could not confirm an association of SDMA with incident CVD.[30] While these data were intriguing, the exact shape of the dose-response relation between these dimethylarginines and CVD has not been described. In addition, the mentioned meta-analysis focused on ADMA/SDMA and CVD, but did not relate the biomarkers to all-cause mortality. Thus, we aim to quantify associations of ADMA and SDMA level with all-cause mortality and CVD in a systematic review and meta-analyses by accounting for differences in study populations (including participants from the general population as well as individuals with underlying diseases) and methodological approaches of the underlying studies.

## Methods

This report follows the Preferred Reporting Items for Systematic Reviews and Meta-Analyses (PRISMA) statement, [31] and the complete PRISMA checklist is provided in [S1 Fig](#).

### Search strategy

A systematic literature search was performed in MEDLINE (PubMed) by two independent investigators (S.S. and R.M.) to identify prospective studies, published until February 2015 that examined the relation between ADMA and SDMA (as exposure variables, each exposure considered separately) and all-cause mortality and CVD (as outcome, each outcome considered separately). There were no limits used in the searches.

Search terms included (ADMA OR dimethylarginin\* OR SDMA) AND ("myocardial infarction" OR death OR mortality OR stroke OR "major adverse cardiac events" OR cardiovascular OR CAD OR "Coronary artery disease" OR CVD OR "Cardiovascular disease" OR "coronary heart disease" OR CHD) AND (Follow-up OR "clinical trial" OR Longitudinal OR prospective OR nested OR cohort OR observational OR endpoint OR "cox regression" OR outcome OR survival OR predict\*). Furthermore, reference lists of relevant papers and previous reviews were hand-searched to assess additional potentially relevant articles.

### Data selection and extraction

**Inclusion criteria.** We included studies if 1) studies had investigated the association between ADMA and/or SDMA with risk of all-cause mortality and/or CVD, 2) studies were original articles, 3) studies had a prospective design, 4) the associations was presented as odds ratio (OR), relative risk (RR) or hazard ratio (HR). In the present manuscript RR stands for all three estimates.

Studies were excluded if 1) they were not reported in English language, 2) they focused on a mixed endpoint (combined endpoint e. g. major adverse cardiac event (MACE), including all-cause mortality and CVD), and 3) studies did not report how ADMA and SDMA were modeled in the statistical analyses (e. g. if it was not clear whether they were modeled as categorical or continuous traits; or when it was unclear whether effect estimates were given per 1-unit or per 1-SD increment in biomarker levels). If such relevant information was missing in the publication, we contacted the corresponding author, and if authors responded, studies were included in our meta-analysis. [10, 16, 29, 32–34]

In the case that multiple studies reported on one dataset, we included the most recent study in our meta-analysis.

Furthermore, three investigators (S.S., R.M. and S.R.S.) independently extracted for each study, information about the first author, publication year, country of the study, study source and design, duration of follow-up, characteristics of the study sample (general population or patients with specific diseases), sex, age, sample size, outcome, type of estimate, number of cases, exposure assessment and categorization, as well as the most comprehensively adjusted OR, RR or HR, with the respective adjustment variables. Estimates and their 95% confidence intervals (95% CI) for ADMA/SDMA in relation to all-cause mortality or CVD were extracted as they were presented in the original reports, including estimates per 1-unit increments, per 1-SD increment, or for the highest versus the lowest categories (e.g. tertiles or quartiles) of ADMA or SDMA, respectively. We contacted the corresponding author, if relevant information was missing.

**Definition of outcomes.** We focused on two outcomes: 1) all-cause mortality and 2) CVD, which was defined as fatal and nonfatal CVD and coronary heart disease events, as it has been done in previous work. [35] Studies that provided effect estimates for a combined

outcome, including all-cause mortality and CVD, were not included in our meta-analysis. If studies reported findings for defined sub-outcomes (e.g. cause-specific mortality) or sub-groups of the overall sample (e.g. stratified for patients with and without surgery), we combined these sub-group/sub-outcome results to estimate effect estimates for the overall sample, [9, 36–38] by using fixed effect models.

## Statistical analyses

We conducted four main analyses: we investigated the associations between 1) ADMA levels and all-cause-mortality, 2) ADMA levels and incident CVD, 3) SDMA levels and all-cause mortality, and 4) SDMA levels and incident CVD.

**High versus low biomarker level.** In the individual studies the exposure variable (the biomarker concentrations) were modeled in different ways (either as a continuous or as a categorical trait) and the effect measures (HRs/RRs/ORs with their corresponding 95% CIs) were reported per different increments in the exposure variable (e.g. per 0.1  $\mu\text{mol/L}$ , per 1  $\mu\text{mol/L}$  or per 1-SD increment in the continuous biomarker; or per tertiles, quartiles or quintiles in biomarker levels; or comparing individuals above vs. below the median). In the present meta-analysis, we harmonized the presentation of the data by providing effect measures for the top vs. the bottom tertile of the ADMA or SDMA distribution. If the effect measures in the original publication were not presented per tertiles, the results had to be converted to a standard scale of effect, by giving an estimate per 2.18 SD units of ADMA or SDMA as described by Danesh *et al.* [39] The factor of 2.18 is the difference in the means of the upper and lower tertile of the standard normal distribution. Thus, this scaling method assumes that the exposure (ADMA or SDMA) follows a normal distribution and the association with disease risk (CVD or mortality) is log-linear. If the original publication reported effect measures by biomarker quartiles, the effect measure of the top vs. the bottom quartile was log-transformed, then multiplied by the factor 2.18/2.54 and the resulting product was exponentiated to the base of  $e$  to derived a RR comparing the top vs. the bottom tertile. [39] For studies reporting results by biomarker quintiles or comparing individuals above vs. below the median we used scaling factors of 2.18/2.80 and 2.18/1.59, respectively. [39] If the original studies reported relative risk increases per 1-SD increment in ADMA or SDMA levels, the log risk ratio was multiplied by 2.18 and subsequently presented as effect measure of the top vs. bottom tertile. Risk ratio that were reported per 1-unit increment, were multiplied by the study specific SD. If some individual studies did not report the study specific biomarker SD for their sample, we used the SD of the largest study (0.14  $\mu\text{mol/L}$  for ADMA and 0.12  $\mu\text{mol/L}$  for SDMA; Email communication with the corresponding author of that study). [16]

Summary RRs (95% CIs) for ADMA and SDMA (each biomarker considered separately) and all-cause mortality and/or CVD (each outcome considered separately) were calculated by applying random effect models. Heterogeneity between studies was evaluated using  $I^2$  statistics.

**Subgroup analyses.** To assess for risk of bias, we conducted subgroup analyses considering the following factors:

- underlying study population (general population, patients with renal disease, patients with prevalent CVD, patients with diabetes mellitus, and, for the analyses with respect to all-cause mortality, critically ill patients from intensive care units),
- number of events (<100, 100 -<200 and  $\geq 200$ ),
- duration of follow-up (longer or shorter than the mean across all studies: <4.7 years and  $\geq 4.7$  years),
- type of blood sample (plasma and serum) used for analyses,

- method for ADMA/SDMA measurement (HPLC, tandem mass spectrometry and ELISA), and
- adjustment for number of important confounders (0–2, 3–5 and  $\geq 6$ , whereas important confounders included age, sex, BMI/or waist circumference, smoking, history of CVD, diabetes, blood pressure/hypertension, blood lipids/hyperlipidemia, family history of CVD and GFR/eGRF).

Heterogeneity between subgroups was assessed by applying meta-regression analysis.

**Dose response meta-analysis.** In a dose-response meta-analysis, we investigated ADMA and SDMA as continuous traits (effect measures per 0.1  $\mu\text{mol/L}$  in biomarker levels) in relation to all-cause mortality and CVD, respectively. If the original publication provided estimates per 1  $\mu\text{mol/L}$  increment in biomarker levels, these were converted into estimates per 0.1  $\mu\text{mol/L}$  increment. If studies did not report the association with all-cause mortality, or CVD with ADMA or SDMA being modeled as a continuous trait but rather for categories of the biomarker, we used the method described by Orsini *et al.* and by Greenland and Longnecker.[40, 41] Here, the study specific slopes and 95% CIs were estimated from the natural logarithms of the RRs and 95% CIs across the categories of ADMA or SDMA, respectively. This requires from each individual study the RR (with 95% CI), the quantified exposure value, and the number of cases and person years for at least three exposure categories.

For studies that did not report the number of person-years in the individual exposure categories, we estimated the person-years per category based on the number of cases per category and the total person-years/ total number of participants and the follow-up period of the entire study, as suggested previously.[42, 43]

For any missing information, we contacted the corresponding author.[15, 16, 44–46] If missing information could not be obtained, we excluded the respective studies from the dose-response analysis.[15, 45, 46] If the author reported the range (rather than the mean) to define an exposure category, we estimated the mean value as previously described.[47, 48]

Finally, we performed cubic spline regression models to explore a potential non-linear relation between di-methylarginines (ADMA/ SDMA) and all-cause mortality or CVD, respectively. For this specific analysis only studies with information on at least three exposure categories (please see above) could be included. To formally test for non-linearity, we used a likelihood ratio test.[49] In a sensitivity analysis, we restricted our analysis to studies which determined ADMA/SDMA by tandem mass spectrometry and ELISA because these methods allowed more reliable quantification of the absolute concentration as compared to the assessment by some of the early HPLC methods (predominantly used in older studies).

All analyses were performed using SAS version 9.3 (SAS Institute, Inc., Cary, NC, USA), R statistical software version 3.0.3 (R Foundation for Statistical Computing, Vienna, Austria) and the R package meta version 3.6–0 (Schwarzer, Freiburg, Germany) and metafor version 1.9–3 (Viechtbauer, Maastricht, The Netherlands). A two-tailed p-value of  $<0.05$  was considered as statistical significant.

## Results

### Literature search and study characteristics

Overall, we identified 711 studies, from which titles and abstracts were reviewed. After screening full-texts of 102 studies, we finally included 50 studies in our meta-analysis (S2 Fig).

Out of these, 34 studies investigated the association between ADMA and all-cause mortality, 30 studies evaluated the association between ADMA and CVD, and 17 studies examined the relation between SDMA and all-cause. A total of 13 studies assessed the association of

SDMA with CVD. Across all studies, the mean follow-up time was 4.7 years (range: 0.1–11.3 years).

Characteristics of the included studies are provided in [Table 1](#) and [S1 Table](#). A total of 8 studies were based on participants of the general population, 12 studies included patients with renal disease, 23 studies included individuals with prevalent CVD, 4 studies provided results for individuals with diabetes mellitus, and 4 studies included patients from the intensive care unit. ADMA and SDMA were measured in plasma in 35 and in serum in 15 studies. In addition, ADMA and SDMA were analyzed using HPLC in 27 studies, using tandem mass spectrometry in 13 studies and with ELISA in 10 studies. The confounders included in the individual studies are shown in the [S1 Table](#).

## Association between ADMA and all-cause mortality

Across all studies ( $n = 34$ , involving 32,428 subjects of which 5,035 died; mean follow-up: 5.4 years), higher ADMA levels were associated with greater risk for all-cause mortality (summary RR: 1.52; 95% CI, 1.37–1.68,  $p < 0.0001$ ; comparing participants in the top ADMA tertile with participants in the bottom ADMA tertile; [Fig 1a](#)). There was evidence for statistical significant heterogeneity across studies ( $I^2 = 88.9\%$ ,  $p < 0.0001$ ).

In subgroup analyses, the strongest association was reported in critically ill patients from intensive care units [summary RR: 4.85; 95% CI, 1.39–16.97,  $p = 0.014$ ; based on 4 studies ( $p_{\text{heterogeneity}} < 0.001$ ); [Table 2](#)]. However, the association between ADMA and all-cause mortality was also statically significant in the general population, and in patients with renal diseases and in those with prevalent CVD. The association in patients with diabetes mellitus reached borderline significance [summary RR: 1.49; 95% CI, 0.99–2.25,  $p = 0.068$ ; based on 4 studies]. In addition, the magnitude of the reported effect tended to be greater in smaller samples and decreased in samples with a larger number of cases ( $p_{\text{heterogeneity}} < 0.0001$ ) and with a longer duration of follow-up ( $p_{\text{heterogeneity}} = 0.001$ ). The effect was slightly stronger in studies measuring ADMA in plasma as compared to studies measuring ADMA in serum ( $p_{\text{heterogeneity}} = 0.033$ ). As expected, studies with more comprehensive adjustments displayed weaker associations than studies including fewer confounders ( $p_{\text{heterogeneity}} = 0.002$ ).

The dose-response meta-analysis revealed that the relative risk for all-cause mortality increased by 7% per each 0.1  $\mu\text{mol/L}$  increment of ADMA [summary RR: 1.07, 95% CI, 1.05–1.10,  $p < 0.0001$ ; based on 15 studies]. However, there was evidence for a non-linear association between ADMA and all-cause mortality ( $p$  for nonlinearity = 0.035, based on 7 studies; [Fig 1b](#)). In a sensitivity analysis, excluding older studies which determined ADMA by HPLC, there was no indication for a non-linear relation ( $p$  for nonlinearity = 0.184, based on 3 studies).

## Association between ADMA and CVD

We observed a positive association of ADMA levels with incident CVD, based on 30 studies with 30,624 subjects and 3,396 incident CVD events; mean follow-up: 6.0 years). Individuals in the top ADMA tertile had 33% greater risk of CVD as compared to individuals in the bottom tertile (summary RR; 1.33; 95% CI, 1.22–1.45,  $p < 0.0001$ ; [Fig 2a](#)). Statistically significant heterogeneity across studies was observed ( $I^2 = 76.6\%$ ,  $p < 0.0001$ ).

In stratified analyses, the positive association between ADMA and CVD could be observed in all relevant subgroups, e.g. in the general population and all clinical samples, in larger and smaller studies, and in studies with longer and shorter follow-up periods ([Table 2](#)).

Modeled as a continuous trait, we observed a 5% increase in CVD risk per each 0.1  $\mu\text{mol/L}$  increment in ADMA [summary RR (95% CI): 1.05 (1.03–1.06),  $p < 0.0001$ ; including 19 studies]. There was no evidence for a non-linear relation between ADMA and CVD ( $p$  for non-

**Table 1. Characteristics of studies included in the meta-analysis focusing on ADMA/SDMA and/or all-cause mortality/CVD.**

| First author, year (country)                                                                            | Study source, study design                                                             | Duration of follow-up in y | Study population                                                                                                                                                                 | Sex, Mean age in y | Sample size | Outcome                                                                         | Type of estimate | No. of events of each outcome | Method for ADMA measurements, Type of sample (Plasma/Serum) | ADMA categories                                                                       | SDMA categories                            |
|---------------------------------------------------------------------------------------------------------|----------------------------------------------------------------------------------------|----------------------------|----------------------------------------------------------------------------------------------------------------------------------------------------------------------------------|--------------------|-------------|---------------------------------------------------------------------------------|------------------|-------------------------------|-------------------------------------------------------------|---------------------------------------------------------------------------------------|--------------------------------------------|
| Valkonen et al., 2001 (Finland)[9]                                                                      | Kuopio Ischemic Heart Disease Risk Factor Study; prospective nested case-control study | 7 y                        | Middle-aged men with and without acute coronary events in the past and who did not smoke                                                                                         | M, 59.9 y          | 150         | CVD (fatal and nonfatal CV events)                                              | OR               | • 45                          | HPLC, serum                                                 | • Quartiles: highest (>0.82 μmol/L)<br>• Per 0.1 μmol/L                               | • -                                        |
| Zoccali et al., 2001 (Italy)[7] (only included for SDMA; for ADMA: most recent report by Tripepi, 2011) | Prospective cohort study                                                               | 2.8 y                      | Patients with end-stage renal disease with haemodialysis                                                                                                                         | M & F, 59.9 y      | 225         | • All-cause mortality<br>• CVD (fatal and nonfatal CV events)                   | HR               | • 83<br>• 81                  | HPLC, plasma                                                | • Quartiles: highest (>3.85 μmol/L with quartile 1 +2 as reference)<br>• Per 1 μmol/L | • Per 1 μmol/L                             |
| Lu et al., 2003 (China)[50]                                                                             | Prospective cohort study                                                               | 1.3 y                      | Patients with stable angina and undergoing percutaneous coronary intervention                                                                                                    | M & F, 71 y        | 153         | • CVD (fatal and nonfatal CV events)                                            | RR               | • 51                          | HPLC, plasma                                                | • Tertiles: highest 0.62 μmol/L<br>• Per 0.1 μmol/L                                   | • Per 1 μmol/L                             |
| Nijveldt et al., 2003 (The Netherlands)[27]                                                             | Prospective cohort study                                                               | na                         | Critical ill patients on the surgical intensive care unit                                                                                                                        | M & F, 58 y        | 52          | • All-cause mortality                                                           | OR               | • 21                          | HPLC, plasma                                                | • Quartiles: highest (>1.05 μmol/L)<br>• Per 1 μmol/L                                 | • Quartiles: highest (na)                  |
| Ravani et al., 2005 (Italy)[51]                                                                         | Prospective cohort study                                                               | 2.3 y                      | Patients with chronic kidney disease (end-stage renal disease)                                                                                                                   | M & F, 71 y        | 131         | • All-cause mortality                                                           | HR               | • 31                          | ELISA, plasma                                               | • Per 0.1 μmol/L                                                                      | • -                                        |
| Schnabel et al., 2005 (Germany)[9]                                                                      | AtheroGene Study, prospective cohort study                                             | 2.6 y                      | Patients with coronary artery disease                                                                                                                                            | M & F, 61 y        | 1874        | • All-cause mortality<br>• CVD (death from cardiovascular cause or nonfatal MI) | HR               | • 101<br>• 114                | ELISA, serum                                                | • Tertiles: highest (>0.7 μmol/L)<br>• Per 1 SD                                       | • -                                        |
| Busch et al., 2006 (Germany)[52]                                                                        | Prospective cohort study                                                               | 2 y                        | Patients with chronic kidney disease                                                                                                                                             | M & F, 57.6 y      | 200         | • CVD                                                                           | HR               | • 47                          | HPLC, plasma                                                | • Quartiles: highest (>1.17 μmol/L)                                                   | • Quartiles: highest (>2.82 μmol/L)<br>• - |
| Mittermayer et al., 2006 (Austria)[45]                                                                  | Prospective cohort study                                                               | 1.6 y                      | Patients with advanced peripheral artery disease                                                                                                                                 | M & F, 70 y        | 496         | • All-cause mortality                                                           | HR               | • 64                          | HPLC, plasma                                                | • Quartiles: highest (>0.64 μmol/L)                                                   | • -                                        |
| Maas et al., 2007 (Germany)[53]                                                                         | KORA; prospective nested case-control study                                            | 6.2 y                      | Initially healthy men                                                                                                                                                            | M, 61.2 y          | 342         | • CVD                                                                           | HR               | • 88                          | ELISA, plasma                                               | • Tertiles: highest ≥0.86 μmol/L                                                      | • -                                        |
| Nicholls et al., 2007 (US)[54]                                                                          | SHOCK-2 trial and Genabank study; prospective cohort study                             | 0.1 y                      | Patients with cardiogenic shock after acute MI                                                                                                                                   | M & F, 72 y        | 79          | • All-cause mortality                                                           | OR               | • 31                          | Tandem mass spectrometry, plasma                            | • Median: higher ≥1.25 μmol/L                                                         | • -                                        |
| Skoro-Sajer et al., 2007 (Austria)[36]                                                                  | Prospective study                                                                      | 3.1 y                      | Patients with chronic thrombo-embolic pulmonary hypertension without unstable atherosclerotic vascular disease, renal dysfunction, untreated hyperlipidemia, obesity and smoking | M & F, 59 y        | 135         | • All-cause mortality                                                           | HR               | • 53                          | HPLC, plasma                                                | • Cut-off by ≥0.64 μmol/L                                                             | • -                                        |
| Lajer et al., 2008 (Denmark)[25]                                                                        | Steno Diabetes Center, prospective cohort study                                        | 11.3 y                     | Patients with type 1 diabetes                                                                                                                                                    | M & F, 42.1 y      | 397         | • All-cause mortality;<br>• CVD (fatal and nonfatal CV events)                  | HR               | • 126<br>• 116                | HPLC, plasma                                                | • Median: higher: ≥0.46 μmol/L                                                        | • -                                        |
| Leong et al., 2008 (Sweden)[55]                                                                         | Population Study of Women in Gothenburg, prospective cohort study                      | 24 y                       | Healthy population-based women                                                                                                                                                   | F, 46 y            | 880         | • All-cause mortality<br>• CVD (fatal and nonfatal CV events)                   | RR               | • 138<br>• 101                | HPLC, plasma                                                | • Per 1 SD (0.15 μmol/L)                                                              | • -                                        |

(Continued)

Table 1. (Continued)

| First author, year (country)       | Study source, study design                                                   | Duration of follow-up in y | Study population                                                                | Sex, Mean age in y | Sample size | Outcome                                                         | Type of estimate | No. of events of each outcome | Method for ADMA measurements, Type of sample (Plasma/Serum) | ADMA categories                                                    | SDMA categories                                      |
|------------------------------------|------------------------------------------------------------------------------|----------------------------|---------------------------------------------------------------------------------|--------------------|-------------|-----------------------------------------------------------------|------------------|-------------------------------|-------------------------------------------------------------|--------------------------------------------------------------------|------------------------------------------------------|
| Wilson Tang et al., 2008 (US)[56]  | ADEPT-study; prospective cohort study                                        | 2.8 y                      | Patients with chronic systolic heart failure                                    | M & F, 57.8 y      | 132         | All-cause mortality                                             | HR               | • 20                          | Tandem mass spectrometry, Plasma                            | • Per 1 SD (0.14 μmol/L)                                           | • -                                                  |
| Zeller et al., 2008 (France)[14]   | Prospective cohort study                                                     | 1 y                        | Patients with acute MI                                                          | M & F, 68.7 y      | 249         | All-cause mortality<br>CVD (fatal CV events; only for ADMA)     | HR               | • 34<br>• 31                  | HPLC, serum                                                 | • Tertiles: highest ≥1.14 μmol/L                                   | • Per 1 μmol/L                                       |
| Aucella F et al., 2009 (Italy)[13] | Prospective cohort study                                                     | 4.6 y                      | Patients with end stage renal disease                                           | M & F, 58 y        | 288         | All-cause mortality<br>CVD (fatal CV events)                    | HR               | • 140;<br>• 70                | HPLC, Plasma                                                | • Per 1 μmol/L                                                     | • Per 1 μmol/L                                       |
| Böger et al., 2009 (US)[18]        | Framingham Offspring Study; prospective cohort study                         | 10.9 y                     | Population based free of CVD at baseline                                        | M & F, 59 y        | 3,320       | All-cause mortality<br>CVD (fatal and nonfatal CV events)       | HR               | • 285<br>• 281                | Tandem mass spectrometry, Plasma                            | • Quartiles highest value not reported<br>• Per 1 SD (0.13 μmol/L) | • -                                                  |
| Cavusoglu et al., 2009 (US)[57]    | Veterans Affairs Medical Center; prospective cohort study                    | 2 y                        | Patients with acute coronary syndrome                                           | M, 64.8 y          | 182         | All-cause mortality                                             | HR               | • 26                          | ELISA, serum                                                | • Tertiles: highest ≥1.115 μmol/L (t1+t2 = ref)                    | • -                                                  |
| Kiechl et al., 2009 (Italy)[58]    | Bruneck study; prospective cohort study                                      | 5 y                        | General population                                                              | M & F, 66.2 y      | 572         | CVD (fatal and nonfatal CV events, stroke)                      | HR               | • 43                          | Tandem mass spectrometry, plasma                            | • Per 1 μmol/L                                                     | • Quartiles: highest ≥0.80 μmol/L;<br>• per 1 μmol/L |
| Wang et al., 2009 (US)[59]         | Cleveland Clinic GENEBANK study; prospective cohort study                    | 3 y                        | Patients with and without significantly obstructive CAD                         | M & F, 63.9 y      | 955         | All-cause mortality                                             | HR               | • 131                         | Tandem mass spectrometry, plasma                            | • Quartiles: highest ≥1.49 μmol/L                                  | • Quartiles: highest ≥1.05 μmol/L                    |
| Young et al., 2009 (US)[21]        | The Modification of Diet in Renal Disease Study; randomized controlled trial | 9.5 y                      | Patients with stage 3 to 4 chronic kidney disease                               | M & F, 52 y        | 820         | All-cause mortality<br>CVD (fatal CV events)                    | HR               | • 202<br>• 122                | ELISA, serum                                                | • Per 1 SD (0.25 μmol/L)                                           | • -                                                  |
| Abedini et al., 2010 (Norway)[22]  | ALEERT-study; randomized, double-blind, placebo-controlled study             | 6.7 y                      | Patients with renal transplant with stable graft function                       | M & F, 49.7 y      | 1,847       | All-cause mortality<br>CVD (fatal and nonfatal CV events)       | HR               | • 343<br>• 207                | HPLC, serum                                                 | • Quartiles highest ≥0.86 μmol/L                                   | • -                                                  |
| Ari et al., 2010 (Turkey)[60]      | Prospective cohort study                                                     | 0.5 y                      | Patients with elective percutaneous transluminal coronary angioplasty and stent | M & F, 57.3 y      | 92          | CVD (fatal and nonfatal CV events, recurrent revascularization) | HR               | • 36                          | ELISA, serum                                                | • Per 1 μmol/L                                                     | • -                                                  |
| Cavusoglu et al., 2010 (US)[26]    | Veterans Administration Medical Center; prospective cohort study             | 2 y                        | Patients with diabetes mellitus                                                 | M, 65.9 y          | 162         | All-cause mortality                                             | HR               | • 24                          | ELISA, plasma                                               | • Tertiles: highest ≥1.05 μmol/L (t2+t1 = ref)                     | • -                                                  |
| Schulze et al., 2010 (UK)[46]      | Prospective cohort study                                                     | 4.3 y                      | Patients with acute ischemic stroke (survived first 30 days after acute stroke) | M & F, 69.8 y      | 394         | All-cause mortality                                             | HR               | • 231                         | Tandem mass spectrometry, plasma                            | • Quartiles: highest >0.50 μmol/L                                  | • Quartiles: highest >0.48 μmol/L                    |
| Shi et al., 2010 (China)[61]       | Prospective cohort study                                                     | 1.3 y                      | Patients with chronic kidney disease and healthy controls                       | M & F, 45.6 y      | 91          | CVD (fatal and nonfatal CV events)                              | HR               | • 25                          | HPLC, plasma                                                | • By median                                                        | • -                                                  |
| Yeo, et al., 2010 (Indonesia)[62]  | Prospective cohort study                                                     | na                         | Patients with severe malaria                                                    | M & F, 29 y        | 49          | All-cause mortality                                             | OR               | • 8                           | HPLC, plasma                                                | • Per 1 μmol/L                                                     | • Per 1 μmol/L                                       |
| Böger, et al., 2011 (Germany)[10]  | GeA(BI) cohort, prospective cohort study                                     | 5 y                        | Primary care patients; with and without peripheral arterial disease             | M & F, 73.1 y      | 2,447       | All-cause mortality<br>CVD (fatal and nonfatal CV events)       | HR               | • 390<br>• 296                | Tandem mass spectrometry, plasma                            | • Quartiles: highest >0.70 μmol/L                                  | • Quartiles: highest >0.57 μmol/L                    |
| Davis et al., 2011 (Australia)[28] | Prospective cohort study                                                     | 0.1 y                      | Patients with sepsis and controls                                               | M & F, 50.5 y      | 98          | All-cause mortality                                             | OR               | • 6                           | HPLC, Plasma                                                | • Quartiles: highest ≥0.66 μmol/L                                  | • Quartiles: highest ≥1.30 μmol/L                    |

(Continued)



Table 1. (Continued)

| First author, year (country)              | Study source, study design                                                                    | Duration of follow-up in y | Study population                                                                                           | Sex, Mean age in y | Sample size | Outcome                                                               | Type of estimate | No. of events of each outcome | Method for ADMA measurements, Type of sample (Plasma/Serum) | ADMA categories                                                   | SDMA categories                                                         |
|-------------------------------------------|-----------------------------------------------------------------------------------------------|----------------------------|------------------------------------------------------------------------------------------------------------|--------------------|-------------|-----------------------------------------------------------------------|------------------|-------------------------------|-------------------------------------------------------------|-------------------------------------------------------------------|-------------------------------------------------------------------------|
| Lu et al., 2011b (China)[63]              | Prospective cohort study                                                                      | 2.4 y                      | Individuals referred for coronary angiography (patients with and without CAD)                              | M & F, 66.9 y      | 997         | All-cause mortality<br>• CVD (fatal and nonfatal CV events, stroke)   | HR               | • 64<br>• 81                  | HPLC, Plasma                                                | • Tertiles: highest >0.48 μmol/L<br>• Per 0.1 μmol/L              | • -                                                                     |
| Meinertz et al., 2011 (Germany)[11]       | LURIC study, prospective cohort study                                                         | 7.7 y                      | Individuals referred for coronary angiography (patients with and without CAD)                              | M & F, 62.6 y      | 3,229       | All-cause mortality<br>• CVD (fatal CV events)                        | HR               | • 749<br>• 469                | HPLC, Serum                                                 | • Quartiles: highest >0.89 μmol/L<br>• Per 1 μmol/L               | • Quartiles: highest >0.63 μmol/L<br>• -                                |
| Tripepi et al., 2011 (Italy)[64]          | Cardiovascular Risk Extended Evaluation in Dialysis Patients cohort, prospective cohort study | 13 y                       | Patients with end stage renal disease                                                                      | M & F, 60 y        | 225         | All-cause mortality<br>• CVD (fatal and nonfatal CV events)           | HR               | • 160<br>• 123                | HPLC, plasma                                                | • Per 1 μmol/L                                                    | • -                                                                     |
| Andersson et al., 2012 (Germany)[37]      | Prospective cohort study                                                                      | 3.3 y                      | Patients with chronic heart failure: dilated cardiomyopathy and ischemic cardiomyopathy                    | M & F, 55.1 y      | 341         | All-cause mortality                                                   | HR               | • 101                         | Tandem mass spectrometry, plasma                            | • Log, per 1 μmol/L                                               | • Quartiles: highest >0.50 μmol/L<br>• Log, per 1 μmol/L                |
| Borgraas et al., 2012 (Norway)[19]        | BECAC, prospective cohort study                                                               | 5.3 y                      | Patients with suspected coronary artery disease                                                            | M & F, 61.0 y      | 1,364       | CVD (fatal and nonfatal CV events)                                    | HR               | • 129                         | Tandem mass spectrometry, plasma                            | • Quartiles: highest ≥0.70 μmol/L                                 | • -                                                                     |
| Cavaletta et al., 2012 (Italy)[65]        | Prospective cohort study                                                                      | 1.8 y                      | Patients with acute coronary syndrome/ consecutive patients with Non-ST-elevation myocardial infarction    | M & F, 66.5 y      | 104         | CVD (CV events and reinfarction)                                      | HR               | • 24                          | HPLC, plasma                                                | • Median: >0.42 μmol/L                                            | • Median: >0.46 μmol/L                                                  |
| Hsu et al., 2012 (China)[66]              | Prospective cohort study                                                                      | 2.4 y                      | Patients with ischemic chronic heart failure                                                               | M & F, 70 y        | 285         | CVD (fatal and nonfatal CV events, stroke)                            | HR               | • 58                          | HPLC, plasma                                                | • Best predictive value: >0.48 μmol/L<br>• Per 1 SD (0.12 μmol/L) | • -                                                                     |
| Visser et al., 2012 (The Netherlands)[29] | Prospective cohort study                                                                      | na                         | Patients with septic or cardiogenic shock                                                                  | M & F, 65.7 y      | 44          | All-cause mortality                                                   | OR               | • 16                          | HPLC, plasma                                                | • Per 1 μmol/L                                                    | • -                                                                     |
| Zairis et al., 2012 (Greece)[67]          | Prospective cohort study                                                                      | 1 y                        | Patients with acute decompensation of chronic heart failure and reduced left ventricular ejection fraction | M & F, 73 y        | 651         | CVD (fatal CV events)                                                 | HR               | • 237                         | HPLC, plasma                                                | • Quartiles: highest ≥1.83 μmol/L                                 | • -                                                                     |
| Gore et al., 2013 (US)[15]                | Dallas Heart Study (DHS), prospective cohort study                                            | 7.4 y                      | General population                                                                                         | M & F, 43 y        | 3,411       | All-cause mortality<br>• CVD (fatal CV events)                        | HR               | • 161<br>• 62                 | Tandem mass spectrometry, plasma                            | • Quintiles: highest ≥0.58 μmol/L<br>• Per log unit change        | • Quintiles: highest ≥0.50 μmol/L per log unit change<br>• Per 1 μmol/L |
| Ignjatovic et al., 2013 (Serbia)[68]      | Prospective cohort study                                                                      | 3 y                        | Patients with end-stage renal disease in hemodialysis                                                      | M & F, 58.0 y      | 153         | All-cause mortality<br>• CVD (fatal CV events)                        | HR               | • 61<br>• 37                  | HPLC, plasma                                                | • Per 1 μmol/L                                                    | • Per 1 μmol/L                                                          |
| Koch et al., 2013a (Germany)[32]          | Prospective cohort study                                                                      | ~3 y                       | Patients with critically illness, with and without sepsis                                                  | M & F, 63 y        | 247         | All-cause mortality                                                   | HR               | • 115                         | ELISA, serum                                                | • -                                                               | • Per 1 μmol/L                                                          |
| Koch et al., 2013b (Germany)[34]          | Prospective cohort study                                                                      | 3 y                        | Patients with critically illness, with and without sepsis                                                  | M & F, 63 y        | 255         | All-cause mortality                                                   | HR               | • 120                         | ELISA, serum                                                | • Per 1 μmol/L                                                    | • -                                                                     |
| Pizzarelli et al., 2013 (Italy)[69]       | InCHIANTI study; prospective cohort study                                                     | 9.2 y                      | General population aged ≥ 65 years                                                                         | M & F, 75 y        | 1,025       | All-cause mortality<br>• CVD (fatal CV events)                        | HR               | • 384<br>• 141                | Tandem mass spectrometry, plasma                            | • Per 0.1 μmol/L                                                  | • -                                                                     |
| Siegerink et al., 2013 (Germany)[20]      | KAROLA study; prospective cohort study                                                        | 8.1 y                      | Patients with stable coronary heart disease                                                                | M & F, 58.7 y      | 1,148       | All-cause mortality<br>• secondary CVD (fatal and nonfatal CV events) | HR               | • 121<br>• 150                | Tandem mass spectrometry, plasma                            | • Quartiles: highest ≥0.64 μmol/L<br>• Per 1 SD (0.12 μmol/L)     | • Quartiles: highest ≥0.59 μmol/L<br>• Per 1 SD (0.16 μmol/L)           |

(Continued)

Table 1. (Continued)

| First author, year (country)                | Study source, study design                                    | Duration of follow-up in y | Study population                                                                           | Sex, Mean age in y | Sample size | Outcome                                       | Type of estimate | No. of events of each outcome                                          | Method for ADMA measurements, Type of sample (Plasma/Serum) | ADMA categories                                                                                                           | SDMA categories                                                                                                        |
|---------------------------------------------|---------------------------------------------------------------|----------------------------|--------------------------------------------------------------------------------------------|--------------------|-------------|-----------------------------------------------|------------------|------------------------------------------------------------------------|-------------------------------------------------------------|---------------------------------------------------------------------------------------------------------------------------|------------------------------------------------------------------------------------------------------------------------|
| Drew et al., 2014 (US) [44]                 | Cognition and Dialysis study cohort; prospective cohort study | 2.3 y                      | Patients on hemodialysis                                                                   | M & F, 63 y        | 259         | All-cause mortality                           | HR               | <ul style="list-style-type: none"> <li>• 130</li> </ul>                | HPLC, plasma                                                | <ul style="list-style-type: none"> <li>• Quartiles: highest mean 0.98 μmol/L</li> <li>• Per 1 SD (0.15 μmol/L)</li> </ul> | • -                                                                                                                    |
| Levin et al., 2014 (Canada) [23]            | Can-PREDDICT; prospective cohort study                        | 1 y                        | Patients with chronic kidney disease                                                       | M & F, 68 y        | 2,402       | All-cause mortality                           | HR               | <ul style="list-style-type: none"> <li>• 137</li> </ul>                | ELISA, serum                                                | <ul style="list-style-type: none"> <li>• Per 1 SD (0.11 μmol/L)</li> </ul>                                                | • -                                                                                                                    |
| Pihström et al., 2014 (Europe, Canada) [24] | ALERT study; prospective cohort study                         | 5.1 y                      | Renal transplant recipients                                                                | M & F, 49.7 y      | 925         | All-cause mortality<br>CVD (fatal CV events)  | HR               | <ul style="list-style-type: none"> <li>• 125</li> <li>• 65</li> </ul>  | HPLC, serum                                                 | • -                                                                                                                       | <ul style="list-style-type: none"> <li>• Quartiles: highest ≥ 1.36 μmol/L</li> </ul>                                   |
| Plicner et al., 2014 (Poland) [38]          | Prospective cohort study                                      | na                         | Patients following coronary artery bypass grafting                                         | M & F, 65.2 y      | 158         | CVD (fatal CV events)                         | OR               | <ul style="list-style-type: none"> <li>• 19</li> </ul>                 | HPLC, plasma                                                | <ul style="list-style-type: none"> <li>• Per 1 μmol/L</li> </ul>                                                          | • -                                                                                                                    |
| Schwedhelm et al., 2014 (Germany) [16]      | SHIP; prospective cohort study                                | 10.1 y                     | General population                                                                         | M & F, 51 y        | 3,952       | All-cause mortality;<br>CVD (fatal CV events) | HR               | <ul style="list-style-type: none"> <li>• 426</li> <li>• 139</li> </ul> | Tandem mass spectrometry, serum                             | <ul style="list-style-type: none"> <li>• Tertiles: highest ≥ 0.72 μmol/L</li> <li>• Per 1 SD (0.14 μmol/L)</li> </ul>     | <ul style="list-style-type: none"> <li>• Tertiles: highest ≥ 0.49 μmol/L;</li> <li>• Per 1 SD (0.12 μmol/L)</li> </ul> |
| Yilmaz et al., 2014 (Turkey) [70]           | Prospective cohort study                                      | 3.3 y                      | Patients with familial Mediterranean fever-related amyloidosis or primary glomerulopathies | M & F, 32 y        | 200         | CVD (fatal and nonfatal CV events)            | HR               | <ul style="list-style-type: none"> <li>• 54</li> </ul>                 | HPLC, serum                                                 | <ul style="list-style-type: none"> <li>• Per 1 μmol/L</li> </ul>                                                          | • -                                                                                                                    |

-, not measured; CVD, cardiovascular disease; na, not available; sd, standard deviation; y, years

doi:10.1371/journal.pone.0165811.t001

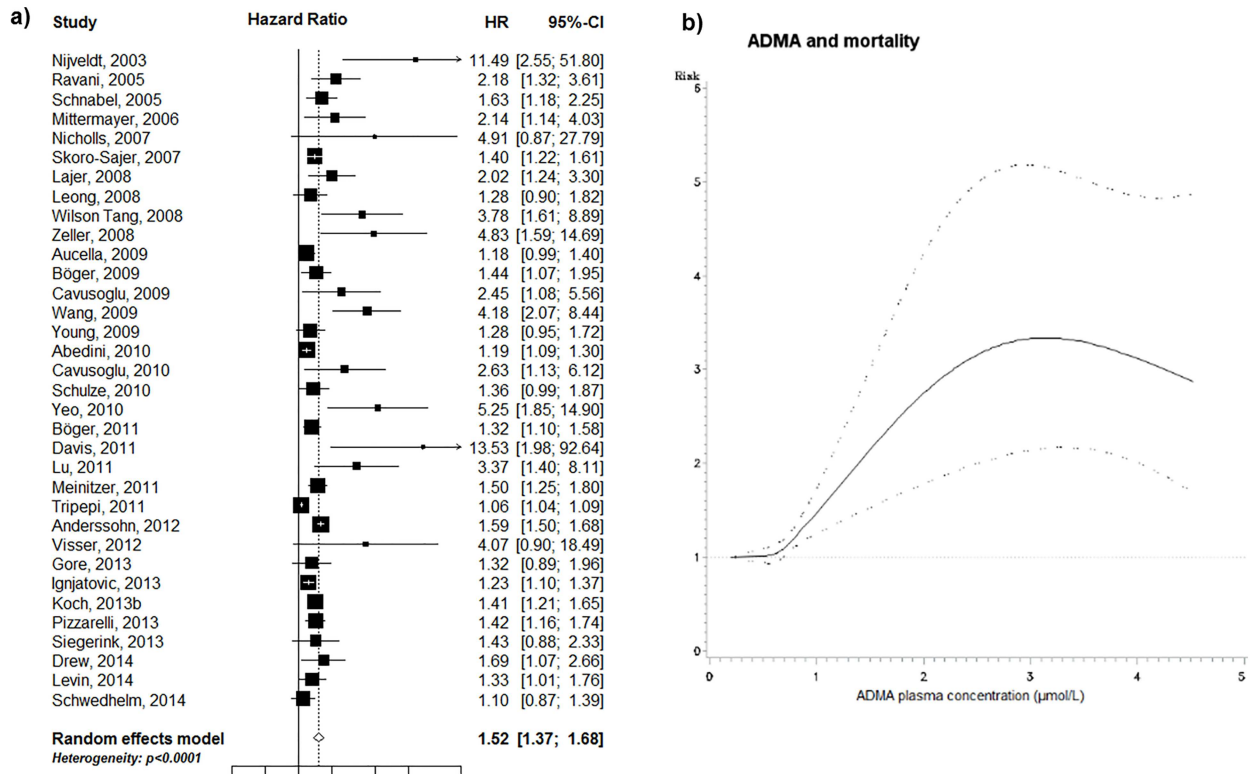

**Fig 1. ADMA and all-cause mortality: a) high versus low analysis, and b) non-linear dose-response analysis (based on 7 studies, p for non-linearity = 0.035).** Black square: point estimate for individual study; horizontal line: 95% CI for observed effect in each study; diamond: pooled estimate and 95% CI for meta-analysis. Random-effects estimate (DerSimonian and Laird method).

doi:10.1371/journal.pone.0165811.g001

linearity = 0.370, based on 10 studies; Fig 2b). Excluding studies which determined ADMA with HPLC, results remained unchanged (p for non-linearity = 0.992, based on 10 studies).

### Association between SDMA and all-cause mortality

In our meta-analysis, based on 17 studies and (18,163 individuals, 2,903 deaths; mean follow-up 4.6 years) SDMA was associated with increased risk of all-cause mortality in the top as compared to the bottom SDMA tertile [(summary RR (95% CI): 1.31 (1.18–1.46),  $p < 0.0001$ ; Fig 3a)]. There was evidence for statistically significant heterogeneity between studies ( $I^2 = 82.1\%$ ,  $p < 0.0001$ ). In subgroups analyses (Table 3), the association was stronger in the general population as compared to defined clinical settings, ( $p_{\text{heterogeneity}} = 0.003$  across all samples), and more prominent in studies with a larger number of events ( $p_{\text{heterogeneity}} = 0.009$ ) and longer duration of follow-up ( $p_{\text{heterogeneity}} = 0.004$ ). We also observed slight differences in the strength (but not in the direction) of the association depending on the method of SDMA assessment ( $p_{\text{heterogeneity}} = 0.020$ ). As expected, studies with a parsimonious set of confounders reported stronger associations as compared to full-adjusted analyses ( $p_{\text{heterogeneity}} = 0.055$ ).

The dose-response meta-analysis for all-cause mortality revealed in a 4% risk increase (95% CI: 2%–5%) per 0.1  $\mu\text{mol/L}$  increment of SDMA ( $p < 0.0001$ , based on 10 studies). However, there was also an indication for a non-linear association between SDMA and all-cause mortality (p for non-linearity = 0.010, based on 4 studies; Fig 3b). When excluding studies HPLC-

**Table 2. Meta-Analysis of ADMA and all-cause mortality or CVD for subgroups.**

| Factors stratified                          | summary RR (95% CI) <sup>‡</sup> | No. of studies | P for heterogeneity between subgroups <sup>†</sup> | summary RR (95% CI) <sup>‡</sup> | No. of studies | P for heterogeneity between subgroups <sup>†</sup> |
|---------------------------------------------|----------------------------------|----------------|----------------------------------------------------|----------------------------------|----------------|----------------------------------------------------|
|                                             | <b>All-cause mortality</b>       |                |                                                    | <b>CVD</b>                       |                |                                                    |
| <b>All</b>                                  | 1.52 (1.37–1.68)                 | 34             |                                                    | 1.33 (1.22–1.45)                 | 30             |                                                    |
| <b>Study population</b>                     |                                  |                |                                                    |                                  |                |                                                    |
| General population                          | 1.30 (1.16–1.47)                 | 5              | 0.001                                              | 1.34 (1.12–1.60)                 | 8              | 0.170                                              |
| Patients with renal diseases                | 1.22 (1.11–1.35)                 | 8              |                                                    | 1.17 (1.06–1.29)                 | 9              |                                                    |
| Patients with existing CVD                  | 1.67 (1.46–1.90)                 | 16             |                                                    | 1.49 (1.30–1.72)                 | 14             |                                                    |
| Patients with diabetes                      | 1.49 (0.99–2.25)                 | 4              |                                                    | 1.94 (0.80–4.66)                 | 2              |                                                    |
| Patients from intensive care unit           | 4.85 (1.39–16.97)                | 4              |                                                    | -                                |                |                                                    |
| <b>Number of events</b>                     |                                  |                |                                                    |                                  |                |                                                    |
| <100                                        | 2.43 (1.84–3.21)                 | 14             | <0.0001                                            | 1.35 (1.19–1.53)                 | 16             | 0.279                                              |
| 100–<200                                    | 1.46 (1.23–1.74)                 | 12             |                                                    | 1.48 (1.17–1.85)                 | 9              |                                                    |
| ≥200                                        | 1.29 (1.20–1.40)                 | 8              |                                                    | 1.23 (1.10–1.37)                 | 5              |                                                    |
| <b>Duration of follow-up (by mean)*</b>     |                                  |                |                                                    |                                  |                |                                                    |
| <4.7 years                                  | 1.65 (1.46–1.87)                 | 18             | 0.001                                              | 1.37 (1.18–1.59)                 | 13             | 0.640                                              |
| ≥4.7 years                                  | 1.27 (1.16–1.40)                 | 13             |                                                    | 1.31 (1.17–1.47)                 | 16             |                                                    |
| <b>Blood sample</b>                         |                                  |                |                                                    |                                  |                |                                                    |
| Plasma                                      | 1.64 (1.42–1.88)                 | 24             | 0.033                                              | 1.29 (1.15–1.44)                 | 21             | 0.466                                              |
| Serum                                       | 1.35 (1.21–1.51)                 | 10             |                                                    | 1.37 (1.22–1.54)                 | 10             |                                                    |
| <b>Method</b>                               |                                  |                |                                                    |                                  |                |                                                    |
| HPLC                                        | 1.45 (1.27–1.65)                 | 16             | 0.962                                              | 1.34 (1.20–1.50)                 | 18             | 0.457                                              |
| Tandem mass spectrometry                    | 1.47 (1.28–1.69)                 | 11             |                                                    | 1.25 (1.10–1.41)                 | 8              |                                                    |
| ELISA                                       | 1.49 (1.30–1.72)                 | 7              |                                                    | 1.52 (1.11–2.08)                 | 4              |                                                    |
| <b>Adjustment for important confounders</b> |                                  |                |                                                    |                                  |                |                                                    |
| 0–2                                         | 2.21 (1.70–2.87)                 | 12             | 0.002                                              | 1.25 (1.07–1.46)                 | 6              | 0.260                                              |
| 3–5                                         | 1.41 (1.21–1.65)                 | 8              |                                                    | 1.60 (1.24–2.06)                 | 7              |                                                    |
| ≥6                                          | 1.34 (1.20–1.49)                 | 14             |                                                    | 1.31 (1.17–1.46)                 | 17             |                                                    |

CI, confidence interval; CVD, cardiovascular disease; HPLC, High-performance liquid chromatography; HR, hazard ratio; ELISA, Enzyme Linked Immunosorbent Assay.

<sup>‡</sup> summary RRs are derived from the maximally adjusted models.

<sup>†</sup> P for heterogeneity between subgroups was evaluated by meta-regression analysis.

\* for all-cause mortality for three studies and for CVD for one study time of follow-up was not available.

doi:10.1371/journal.pone.0165811.t002

based measurements, there was no evidence for non-linearity ( $p = 0.425$ ). However, this analysis was based on 2 studies only.

### Association between SDMA and CVD

The risk for incident CVD (based on 13 studies, including 16,807 subjects and 1,534 cases; mean follow-up 4.9 years) was 36% higher for participants in the upper tertile compared to participants in the lowest tertile [summary RR (95% CI): 1.36 (1.10–1.68); Fig 4a]. Statistically significant heterogeneity between studies was observed ( $I^2 = 76.6\%$ ;  $p < 0.0001$ ). In subgroup

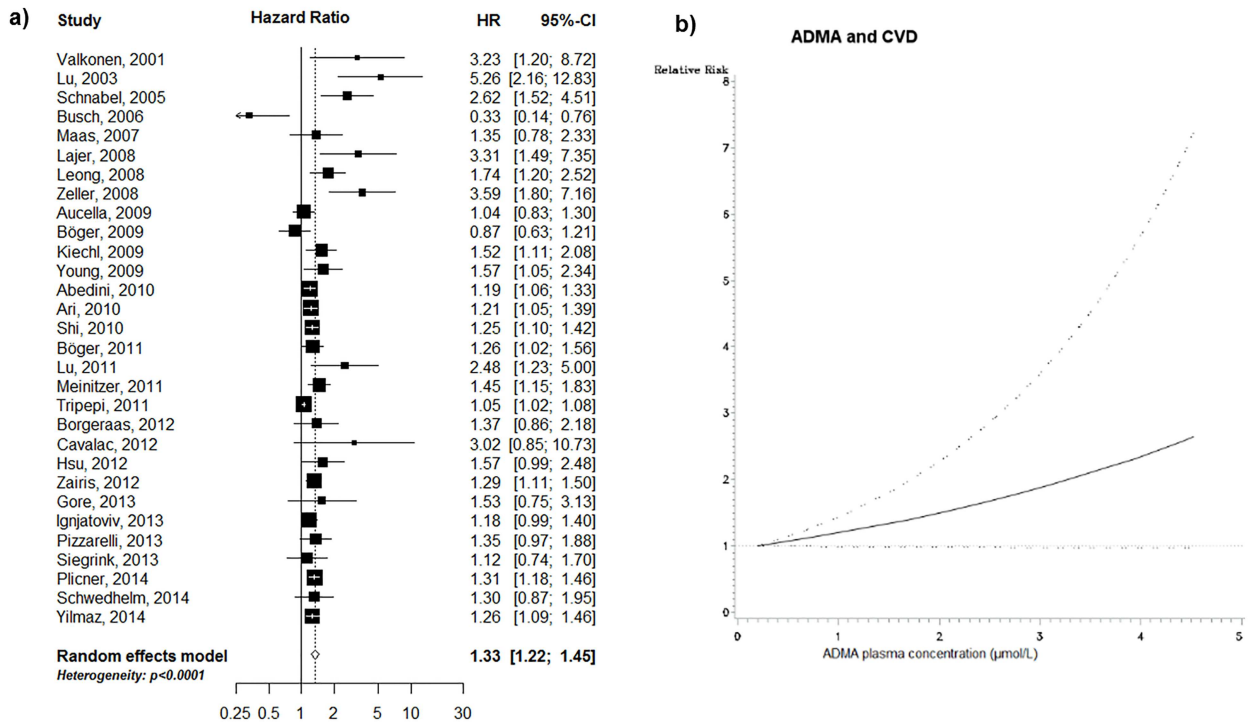

**Fig 2. ADMA and CVD: a) high versus low analysis, and b) non-linear dose-response analysis (based on 10 studies,  $p$  for non-linearity = 0.370).** Black square: point estimate for individual study; horizontal line: 95% CI for observed effect in each study; diamond: pooled estimate and 95% CI for meta-analysis. Random-effects estimate (DerSimonian and Laird method).

doi:10.1371/journal.pone.0165811.g002

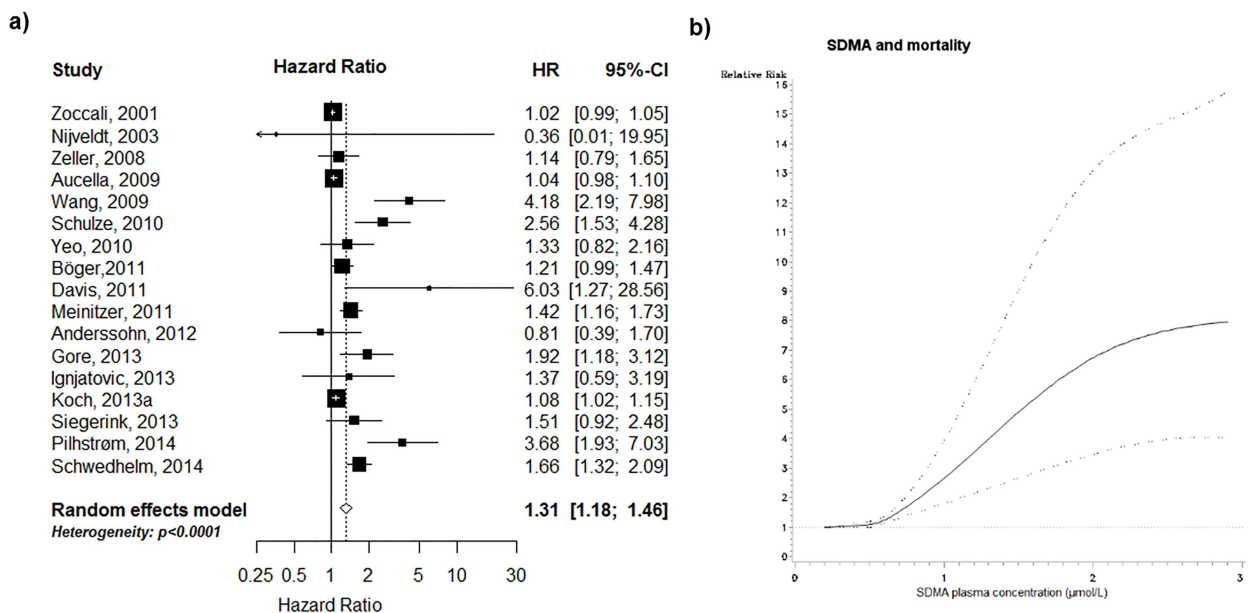

**Fig 3. SDMA and all-cause mortality: a) high versus low analysis, and b) non-linear dose-response analysis (based on 4 studies,  $p$  for non-linearity = 0.010).** Black square: point estimate for individual study; horizontal line: 95% CI for observed effect in each study; diamond: pooled estimate and 95% CI for meta-analysis. Random-effects estimate (DerSimonian and Laird method).

doi:10.1371/journal.pone.0165811.g003

**Table 3. Meta-Analysis of SDMA and all-cause mortality or CVD for subgroups.**

| Factors stratified                             | summary RR (95% CI) <sup>‡</sup> | No. of studies | P for heterogeneity between subgroups <sup>†</sup> | summary RR (95% CI) <sup>‡</sup> | No. of studies | P for heterogeneity between subgroups <sup>†</sup> |
|------------------------------------------------|----------------------------------|----------------|----------------------------------------------------|----------------------------------|----------------|----------------------------------------------------|
|                                                | <b>All-cause mortality</b>       |                |                                                    | <b>CVD</b>                       |                |                                                    |
| <b>All</b>                                     | 1.31 (1.18–1.46)                 | 17             |                                                    | 1.36 (1.10–1.68)                 | 13             |                                                    |
| <b>Study population</b>                        |                                  |                |                                                    |                                  |                |                                                    |
| General population                             | 1.71 (1.39–2.10)                 | 2              | 0.003                                              | 2.00 (1.42–2.82)                 | 3              | 0.023                                              |
| Patients with renal diseases                   | 1.12 (0.99–1.25)                 | 5              |                                                    | 1.12 (0.88–1.41)                 | 6              |                                                    |
| Patients with existing CVD                     | 1.52 (1.15–2.02)                 | 7              |                                                    | 1.27 (0.79–2.05)                 | 5              |                                                    |
| Patients with diabetes                         | -                                | -              |                                                    | -                                | -              |                                                    |
| Patients from intensive care unit <sup>§</sup> | 1.28 (0.84–1.94)                 | 4              |                                                    | -                                | -              |                                                    |
| <b>Number of events</b>                        |                                  |                |                                                    |                                  |                |                                                    |
| <100                                           | 1.14 (0.92–1.42)                 | 6              | 0.009                                              | 1.52 (1.08–2.16)                 | 9              | 0.583                                              |
| 100–<200                                       | 1.06 (0.99–1.13)                 | 7              |                                                    | 1.51 (1.09–2.09)                 | 2              |                                                    |
| ≥200                                           | 1.52 (1.22–1.90)                 | 4              |                                                    | 1.17 (0.76–1.78)                 | 2              |                                                    |
| <b>Duration of follow-up (by mean)*</b>        |                                  |                |                                                    |                                  |                |                                                    |
| <4.7 years                                     | 1.13 (1.02–1.25)                 | 9              | 0.004                                              | 1.19 (0.83–1.70)                 | 6              | 0.297                                              |
| ≥4.7 years                                     | 1.59 (1.29–1.96)                 | 6              |                                                    | 1.52 (1.14–2.03)                 | 7              |                                                    |
| <b>Blood sample</b>                            |                                  |                |                                                    |                                  |                |                                                    |
| Plasma                                         | 1.27 (1.11–1.46)                 | 12             | 0.369                                              | 1.23 (0.97–1.56)                 | 10             | 0.134                                              |
| Serum                                          | 1.46 (1.11–1.91)                 | 5              |                                                    | 1.56 (1.28–1.91)                 | 3              |                                                    |
| <b>Method</b>                                  |                                  |                |                                                    |                                  |                |                                                    |
| HPLC                                           | 1.18 (1.04–1.33)                 | 9              | 0.020                                              | 1.31 (0.98–1.76)                 | 8              | 0.563                                              |
| Tandem mass spectrometry                       | 1.72 (1.28–2.30)                 | 7              |                                                    | 1.52 (1.01–2.29)                 | 5              |                                                    |
| <b>Adjustment for important confounders</b>    |                                  |                |                                                    |                                  |                |                                                    |
| 0–2                                            | 2.26 (1.28–3.99)                 | 7              | 0.055                                              | 5.10 (0.96–27.15)                | 2              | 0.214                                              |
| 3–5                                            | 1.32 (0.97–1.78)                 | 4              |                                                    | 1.31 (0.57–3.04)                 | 4              |                                                    |
| ≥6                                             | 1.15 (1.04–1.27)                 | 6              |                                                    | 1.15 (0.96–1.37)                 | 7              |                                                    |

CI, confidence interval; CVD, cardiovascular disease; HPLC, High-performance liquid chromatography; HR, hazard ratio.

<sup>‡</sup> summary RRs are derived from the maximally adjusted models.

<sup>†</sup> P for heterogeneity between subgroups was evaluated by meta-regression analysis.

<sup>§</sup> only one study investigated SDMA and all-cause mortality or CVD, respectively in patients with diabetes.

\* for all-cause mortality for two studies time of follow-up was not available.

doi:10.1371/journal.pone.0165811.t003

analyses, the association was strongest in samples from the general population (as compared to clinical settings;  $p_{\text{heterogeneity}} = 0.023$ ), but no major differences between the other subgroups evaluated could be observed (Table 3).

In the dose-response meta-analysis, the risk of CVD increased by 3% per 0.1  $\mu\text{mol/L}$  increment of SDMA [borderline significant: summary RR (95% CI): 1.03 (1.00–1.06),  $p < 0.072$ ; based on 9 studies]. There was no evidence for a non-linear relation between SDMA and CVD ( $p$  for non-linearity = 0.059, based on 5 studies; Fig 4b). Consistently, there was no indication for a non-linear trend after excluding of studies using HPLC for biomarker measurements ( $p$  for non-linearity = 0.096, based on 3 studies).

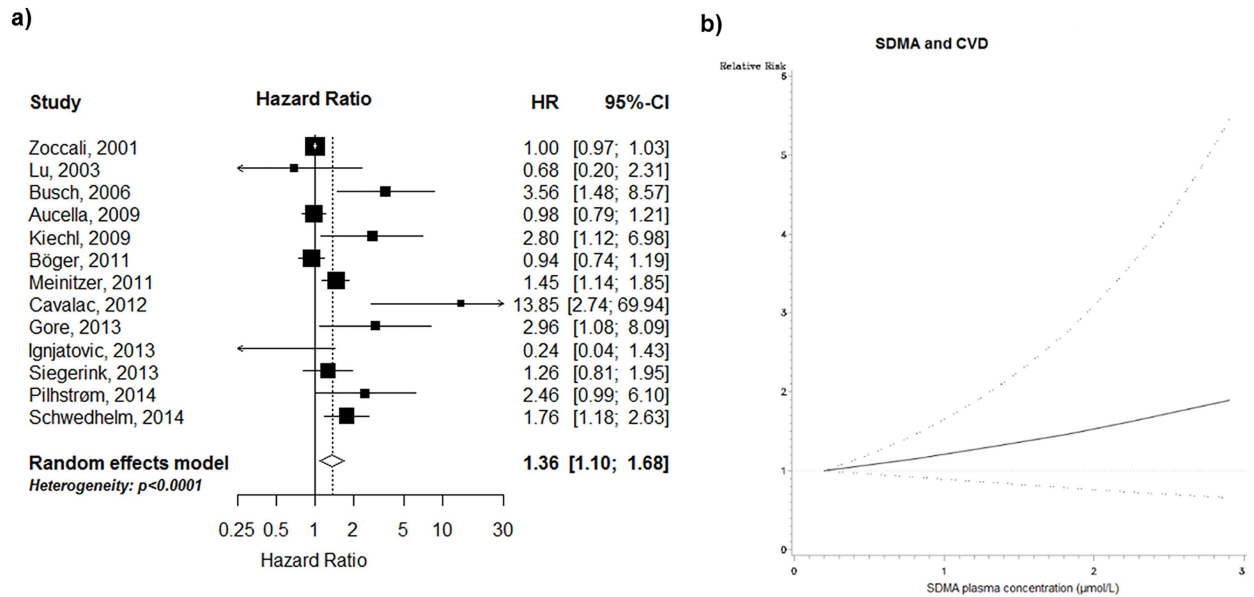

**Fig 4. SDMA and CVD: a) high versus low analysis, and b) non-linear dose-response analysis (based on 5 studies,  $p$  for non-linearity = 0.059).** Black square: point estimate for individual study; horizontal line: 95% CI for observed effect in each study; diamond: pooled estimate and 95% CI for meta-analysis. Random-effects estimate (DerSimonian and Laird method).

doi:10.1371/journal.pone.0165811.g004

## Discussion

The main results of our systematic review and meta-analysis were as follows. First, circulating concentrations of both biomarkers, ADMA and SDMA, were independently associated with a modestly increased risk of all-cause mortality and of incident CVD. Second, the association of ADMA with CVD was robust in all examined subgroups and across all study populations; its association with mortality was likewise observed in many subgroups but particularly strong in critically ill individuals. Third, the association with SDMA and both outcomes, mortality and CVD, was particularly strong in samples from the general population.

### In the context of the published literature

**ADMA and all-cause mortality.** Individuals with ADMA levels in the top tertile had an about 50% increased risk of all-cause mortality compared with individuals in the bottom tertile of ADMA levels and was particularly strong in critically ill patients on intensive care units. In the literature, the most profound elevations of ADMA have been reported in patients with organ failure such as seen in sepsis. Thus the extent of elevation of ADMA in critically ill patients may simply reflect the severity of organ failure,[34] which in turn is strongly related to adverse outcomes. In addition, based on excess mortality observed in clinical trials of NOS-inhibitors in critically ill patients,[71] it has been speculated that ADMA may also aggravate clinical outcomes.[72] Recent data from mice with impaired ADMA metabolism point in the same direction.[73]

As expected, slight differences between studies were observed, with slightly smaller effects being reported in studies of higher quality (higher number of events, longer duration of follow-up and higher number of included confounders in the statistical analysis). In addition, associations were slightly stronger for studies that measured ADMA in plasma compared to studies measuring it in the serum. In our dose-response meta-analysis there was evidence for a non-

linear relation between ADMA and all-cause mortality, with a steeper increase in risk for ADMA levels around  $>0.6 \mu\text{mol/l}$ ; however, with ADMA concentrations around  $>3.0 \mu\text{mol/l}$  the risk slightly decreased. In a sensitivity analysis, restricted to studies that assessed ADMA by tandem mass spectrometry and ELISA, the association between ADMA and all-cause mortality was almost linear.

**ADMA and CVD.** We observed a relative CVD risk increase of 33% in individuals in the top vs. the bottom ADMA tertile. Our results are consistent with a previous, slightly smaller meta-analysis based on 22 prospective studies, including 19,842 subjects and 2,339 CVD events. Indeed, Willeit and colleagues reported a very similar summary effect estimate [RR (95%CI): 1.42 (1.29–1.56)]. Exclusion criteria of the latter meta-analysis were stricter compared to our criteria, and thus our meta-analysis was based on more studies and a higher number of individuals and events (30 studies, 30,624 subjects and 3,396 CVD cases). Our results are consistent with some prior analyses in individual studies and we demonstrate that after including all currently available studies we see a positive association between ADMA and CVD, however, some individual studies, including the Framingham study, failed to observe an association between ADMA and CVD.

**SDMA and all-cause mortality.** Our meta-analysis indicated that individuals in the top SDMA tertile were at higher risk (RR: 31%) of dying from any cause as compared to individuals in the bottom SDMA tertile. The association was strongest in samples from the general population and less prominent in patients with prevalent cardiovascular disease. In patients with renal failure, the association failed to reach statistical significance. SDMA is much more sensitive to changes in renal function as compared to ADMA,[74] which may explain its weaker independent association with adverse outcomes in renal disease when renal function is adjusted for. Similar to the findings regarding ADMA and all-cause mortality, the strongest increase of risk was observed at SDMA levels approximately  $>0.6 \mu\text{mol/l}$ , and with extreme values, the risk increase was attenuated. However, excluding HPLC-based SDMA measurement, there was no indication for a non-linear association.

**SDMA and CVD.** In our meta-analysis, SDMA was associated with 36% (95% CI: 10% to 68%) increased risk of CVD, by comparing individuals in the top tertile with individuals in the bottom tertile of SDMA. In the meta-analysis mentioned above, a very similar risk estimate was reported that failed to reach statistical significance, [summary RR (95% CI) 1.32 (0.92–1.90)], probably due to the smaller number of studies ( $n = 8$ ; total  $n = 9,070$ ) and events ( $n = 848$ ) included.[30] In our report, we included 13 studies with a total of 16,807 individuals (events = 1,534). Our findings were consistent in analyses stratified by study characteristics, method of ADMA assessment and duration of follow-up. However, as in our analyses relating SDMA to all-cause mortality, the association with CVD risk was likewise strongest in samples from the general population.

## Change in methods of biomarker determination over time

Stratification of studies by the methodology used to determine ADMA/SDMA showed some degree of heterogeneity with respect to total mortality which is unlikely to be attributable to clinical differences between the underlying studies.

As with any new biomarker, the methodology for the quantification of ADMA and SDMA has advanced over recent years and has become more and more standardized.[75] Initial clinical studies predominantly relied on high pressure liquid chromatography (HPLC) methods for the detection of ADMA and SDMA.[3, 7, 8] In these early studies, biomarker quantification—especially in absolute terms—was rather challenging due to the limited availability of defined pure ADMA and SDMA standards and reference samples. Limited



knowledge regarding the prevalence and interference by chemically related compounds added further uncertainties. This may explain the continuous decline in the mean ADMA plasma concentration reported for similar clinical settings, going down from 0.95  $\mu\text{mol/l}$  for healthy controls in 2001 to 0.41  $\mu\text{mol/l}$  in 2011.[7, 76] In the case of SDMA, matters may have been further aggravated by the fact that it was considered to be a biologically inactive byproduct and thus may have received less methodological scrutiny. The less well validated methodology for SDMA determination may also have contributed to the initially mostly negative results regarding SDMA as a risk marker. It may also explain why commercial immunoassays emerged much earlier for ADMA than for SDMA.[9, 32] The introduction of mass spectrometric methods allowed the more reliable determination of reference values for ADMA and SDMA, [77–79] which may help to calibrate and (re)interpret early ADMA and SDMA data.

### ADMA and SDMA levels and risk prediction and clinical utility

In our present-meta analysis, we confirm a positive and statistically significant association of ADMA and SDMA with all-cause mortality and CVD. All associations were relatively consistent across multiple subgroups, but varied in magnitude. In order for ADMA or SDMA measurements to be considered applicable for routine clinical use it needs to be demonstrated, that measuring ADMA or SDMA affects patient management and ultimately patient outcome. [80, 81]

Wang et al. suggested possible additive effects of ADMA and SDMA with respect to the predictions of major adverse cardiac events and proposed an “arginine methylation index” ( $[\text{ADMA}+\text{SDMA}]/\text{Monomethyl-Arginine}$ ).[59] This index was statistically independently associated with MACE. However, only few studies investigated whether the addition of ADMA or SDMA improves established indices of risk prediction models, including improvement in discrimination, calibration, and reclassification.[81] Gore and colleagues reported statistically significant increase in the C-statistic after adding SDMA to a model predicting all-cause mortality and CVD in the general population.[15] However, the absolute increments in discrimination were unlikely to be clinically relevant. Other studies did not find a relevant increment in the C-statistic once ADMA or SDMA were added to the statistical prediction models in different clinical settings.[11, 15, 18, 23, 69] This concept also warrants further investigation. It needs to be established, however, whether inclusion of ADMA or SDMA improves risk prediction models (e. g. discrimination, reclassification)[81] beyond classic risk factors or that the increased risk for CVD and mortality associated with higher ADMA or SDMA can be specifically treated. It can be speculated that in clinical practice determination ADMA may be especially useful in critically ill patients while SDMA may be more suitable and useful in the general population. Further studies are warranted to confirm or refute this hypothesis.

In contrast to other risk markers like LDL-cholesterol distinct pharmacological targeting of ADMA or SDMA has not been clinically successful, so far. Still, assuming a causal role in CVD further approaches have been proposed[82]:

1. Direct targeting of circulating ADMA or SDMA. In principle ADMA or SDMA concentrations could be reduced by a decrease of dietary uptake or endogenous generation of ADMA/SDMA or by increased elimination (i.e. increase of cellular exchange, transport and metabolism).[2]
2. Treatment of putative pathophysiological effects of ADMA or SDMA. In case of ADMA, L-arginine has widely been advocated as an “antidote”. [83] However, supplementation of L-arginine irrespective of underlying ADMA-levels failed to improve cardiovascular outcome

and prospective studies with long term supplementation of L-arginine in patients with elevation of ADMA and follow-up for relevant clinical endpoints (mortality) remain to be conducted.[84]

## Shared and distinct properties of ADMA and SDMA

ADMA and SDMA are chemically closely related and both associated with incident CVD and total mortality. However, the present study indicates that both compounds may slightly differ in the pattern and in the strength of their association with clinical endpoints within the same cohort as well as across distinct clinical settings.

Methodological aspects, discussed further above, aside these observations are not surprising, considering the overlapping as well as distinct metabolic and (patho-) physiological properties of ADMA and SDMA (summarized in [Table 4](#)). It also is possible, if not likely, that ADMA and SDMA may act both as risk markers as well as risk factors. The plasma levels of ADMA and SDMA are affected by several overlapping as well as distinct metabolic pathways.[3, 4, 85–90] Elevation of ADMA may predominantly represent impaired dimethylarginine dimethylaminohydrolase (DDAH) activity [4] while elevation of SDMA more likely reflects impaired renal function [91, 92] and/or impaired alanine—glyoxylate aminotransferase 2 (AGXT2) activity (i.e. hyper beta-aminoisobutyric acid uria).[89, 93, 94] Moreover, ADMA and SDMA have overlapping as well as distinct biological effects ([Table 4](#)). While both compounds may alter cellular exchange (i.e. transport) of L-arginine,[1] only ADMA appears to be a direct inhibitor of NOS. [2, 3] Independent of the L-arginine-NO-pathway SDMA may exercise biological effects through alternative mechanisms augmenting oxidative stress or activate toll-like receptors.[95, 96]

## Strengths and limitations

Our meta-analysis has several strengths. To our knowledge, there is no prior large scale meta-analysis quantifying the association between ADMA, SDMA and all-cause mortality. Regarding the association of both biomarkers with CVD, the present study includes a much larger number of studies, patients and clinical events than any previous review or meta-analysis for ADMA or SDMA. This allowed us to consider key methodological factors and subgroup analyses. In addition, we also performed a dose-response meta-analysis of the relation between ADMA; SDMA and all-cause mortality or CVD and assessed the exact shape of the association between biomarker and outcome.

However, our meta-analysis has some limitations that merit consideration. First, we observed high heterogeneity between studies included in our meta-analysis. Thus, we performed stratified analyses by accounting for different study populations, study characteristics and assessment methods of ADMA and SDMA. Slight differences between subgroups were detected, but in general, effects were present across all or most strata. Second, regarding the dose-response analysis, the number of studies we could include was limited because of partially incomplete information in individual studies. Thus, we were not able to stratify the dose-response meta-analysis by different populations or methodological approaches, and more research exploring dose-response relations is warranted. Third, the majority of the included studies were based on diseased cohorts and evidence of the association between particularly SDMA and all-cause mortality or CVD in the community is still rare. Thus, more population-based studies investigating this association are needed. Fourth, we conducted our literature search in Medline only and thus, it might be possible that we missed few of the relevant studies. However, we hand-searched all included studies and reviews to check for additional relevant articles.

**Table 4. Differences and similarities in the biological properties of ADMA and SDMA.**

|                               | ADMA                                                                                                                                                                                                                                                                                                                                                                                                                                             | SDMA                                                                                                                                                                                                                                                                                                                                                                                                                                                                                                                                  |
|-------------------------------|--------------------------------------------------------------------------------------------------------------------------------------------------------------------------------------------------------------------------------------------------------------------------------------------------------------------------------------------------------------------------------------------------------------------------------------------------|---------------------------------------------------------------------------------------------------------------------------------------------------------------------------------------------------------------------------------------------------------------------------------------------------------------------------------------------------------------------------------------------------------------------------------------------------------------------------------------------------------------------------------------|
| Generation / source [2]       | <p><b>Endogenous formation</b> [3]</p> <ul style="list-style-type: none"> <li>• Monomethylation of protein-bound L-arginine by type I and II PRMTs [85]</li> <li>• Asymmetric dimethylation of protein-bound monomethylarginine by type I PRMTs [85]</li> <li>• Liberation of ADMA by protein degradation [86]</li> </ul> <p><b>Exogenous/ dietary uptake</b></p> <ul style="list-style-type: none"> <li>• Exact contribution unknown</li> </ul> | <p><b>Endogenous formation</b> [3]</p> <ul style="list-style-type: none"> <li>• Monomethylation of protein-bound L-arginine by type I and II PRMTs [85]</li> <li>• Asymmetric dimethylation of protein-bound monomethylarginine by type II PRMTs [85]</li> <li>• Liberation of SDMA by protein degradation [87]</li> </ul> <p><b>Exogenous/ dietary uptake</b></p> <ul style="list-style-type: none"> <li>• Exact contribution unknown</li> </ul>                                                                                     |
| Distribution / transport [88] | <ul style="list-style-type: none"> <li>• Cellular uptake and efflux mediated by cationic amino acid transporters</li> </ul>                                                                                                                                                                                                                                                                                                                      | <ul style="list-style-type: none"> <li>• Cellular uptake and efflux mediated by cationic amino acid transporters</li> </ul>                                                                                                                                                                                                                                                                                                                                                                                                           |
| Elimination [2]               | <p><b>Metabolism</b></p> <ul style="list-style-type: none"> <li>• Major route of elimination [3, 89, 90]</li> <li>• Major metabolising enzymes               <ol style="list-style-type: none"> <li>1. DDAH1 and DDAH2 [4]</li> <li>2. AGXT2 [91]</li> <li>3. Butylation and Methylation [90]</li> </ol> </li> </ul> <p><b>Renal Excretion</b></p> <ul style="list-style-type: none"> <li>• Minor route of elimination [92, 93]</li> </ul>       | <p><b>Metabolism</b></p> <ul style="list-style-type: none"> <li>• Minor route of elimination [89, 90]               <ol style="list-style-type: none"> <li>1. No substrate of DDAHs</li> <li>2. AGXT2 [91] (Major metabolising enzyme)</li> <li>3. Butylation and Methylation [90, 94]</li> </ol> </li> </ul> <p><b>Renal Excretion</b></p> <ul style="list-style-type: none"> <li>• Major route of elimination [92, 93]</li> </ul>                                                                                                   |
| Biological effects            | <ul style="list-style-type: none"> <li>• Inhibition of nitric oxide synthases (eNOS, nNOS and iNOS) [2, 3]</li> <li>• Weak inhibition of L-arginine transport [88]</li> <li>• Activation of NF-κB with enhanced expression of inflammatory cytokines [95]</li> </ul>                                                                                                                                                                             | <ul style="list-style-type: none"> <li>• No clinically relevant direct inhibition of nitric oxide synthases [3]</li> <li>• Possible weak indirect inhibition of NO-Synthesis [96]</li> <li>• Weak inhibition of L-arginine transport [88]</li> <li>• Activation of NF-κB with enhanced expression of inflammatory cytokines [97]</li> <li>• Increase in monocytic ROS production by enhanced activation of store-operated Ca<sup>2+</sup> channels [98]</li> <li>• Modification of HDL activating toll like Receptors [99]</li> </ul> |

ADMA, Asymmetric dimethylarginine; AGXT2; alanine—glyoxylate aminotransferase 2; DDAH, dimethylarginine dimethylaminohydrolase; eNOS, endothelial nitric-oxide synthase; HDL, high density lipoprotein; iNOS, inducible nitric-oxide synthase; NF-κB, nuclear factor kappa-light-chain-enhancer of activated B cells; nNOS; neuronal nitric oxide synthase; PRMT, protein arginine N-methyltransferase; ROS, reactive oxygen species; SDMA, symmetrical dimethylarginine

doi:10.1371/journal.pone.0165811.t004

## Conclusions

In conclusion, this meta-analysis including a large number of prospective studies indicates that ADMA and SDMA are independently associated with all-cause mortality and CVD across a broad spectrum of populations and clinical conditions.

## Supporting Information

**S1 Fig. PRISMA checklist.**  
(PDF)

**S2 Fig. Flowchart of study selection for the meta-analysis.**  
(PDF)

**S1 Table. Considered confounders of each study included in the meta-analysis.**  
(PDF)

## Author Contributions

**Conceptualization:** WL RM.

**Data curation:** SS SRS RM.

**Formal analysis:** SS.

**Investigation:** SS WL RM.

**Methodology:** SS WL RM.

**Project administration:** WL RM.

**Resources:** WL RM.

**Visualization:** SS.

**Writing – original draft:** SS WL RM.

**Writing – review & editing:** SS SRS WL RM.

## References

1. Strobel J, Müller F, Zolk O, Endress B, König J, Fromm MF, et al. Transport of asymmetric dimethylarginine (ADMA) by cationic amino acid transporter 2 (CAT2), organic cation transporter 2 (OCT2) and multidrug and toxin extrusion protein 1 (MATE1). *Amino Acids*. 2013; 45(4):989–1002. Epub 2013/07/19. doi: [10.1007/s00726-013-1556-3](https://doi.org/10.1007/s00726-013-1556-3) PMID: [23864433](https://pubmed.ncbi.nlm.nih.gov/23864433/).
2. Kittel A, Maas R. Pharmacology and clinical pharmacology of methylarginines used as inhibitors of nitric oxide synthases. *Curr Pharm Des*. 2014; 20(22):3530–47. PMID: [24180385](https://pubmed.ncbi.nlm.nih.gov/24180385/).
3. Vallance P, Leone A, Calver A, Collier J, Moncada S. Accumulation of an endogenous inhibitor of nitric oxide synthesis in chronic renal failure. *Lancet*. 1992; 339(8793):572–5. PMID: [1347093](https://pubmed.ncbi.nlm.nih.gov/1347093/).
4. Leiper J, Nandi M, Torondel B, Murray-Rust J, Malaki M, O'Hara B, et al. Disruption of methylarginine metabolism impairs vascular homeostasis. *Nat Med*. 2007; 13(2):198–203. doi: [10.1038/nm1543](https://doi.org/10.1038/nm1543) PMID: [17273169](https://pubmed.ncbi.nlm.nih.gov/17273169/).
5. Jacobi J, Maas R, Cardounel AJ, Arend M, Pope AJ, Cordasic N, et al. Dimethylarginine dimethylaminohydrolase overexpression ameliorates atherosclerosis in apolipoprotein E-deficient mice by lowering asymmetric dimethylarginine. *Am J Pathol*. 2010; 176(5):2559–70. Epub 2010/03/30. S0002-9440(10)60051-X [pii] doi: [10.2353/ajpath.2010.090614](https://doi.org/10.2353/ajpath.2010.090614) PMID: [20348244](https://pubmed.ncbi.nlm.nih.gov/20348244/); PubMed Central PMCID: PMC2861120.
6. Kielstein JT, Impraim B, Simmel S, Bode-Böger SM, Tsikas D, Frölich JC, et al. Cardiovascular effects of systemic nitric oxide synthase inhibition with asymmetrical dimethylarginine in humans. *Circulation*. 2004; 109(2):172–7. Epub 2003/12/10. doi: [10.1161/01.CIR.0000105764.22626.B1](https://doi.org/10.1161/01.CIR.0000105764.22626.B1) 01. CIR.0000105764.22626.B1 [pii]. PMID: [14662708](https://pubmed.ncbi.nlm.nih.gov/14662708/).
7. Zoccali C, Bode-Böger S, Mallamaci F, Benedetto F, Tripepi G, Malatino L, et al. Plasma concentration of asymmetrical dimethylarginine and mortality in patients with end-stage renal disease: a prospective study. *Lancet*. 2001; 358(9299):2113–7. Epub 2002/01/11. S0140673601072178 [pii]. PMID: [11784625](https://pubmed.ncbi.nlm.nih.gov/11784625/).
8. Valkonen VP, Paiva H, Salonen JT, Lakka TA, Lehtimäki T, Laakso J, et al. Risk of acute coronary events and serum concentration of asymmetrical dimethylarginine. *Lancet*. 2001; 358(9299):2127–8. Epub 2002/01/11. S0140-6736(01)07184-7 [pii] doi: [10.1016/S0140-6736\(01\)07184-7](https://doi.org/10.1016/S0140-6736(01)07184-7) PMID: [11784629](https://pubmed.ncbi.nlm.nih.gov/11784629/).
9. Schnabel R, Blankenberg S, Lubos E, Lackner KJ, Rupprecht HJ, Espinola-Klein C, et al. Asymmetric dimethylarginine and the risk of cardiovascular events and death in patients with coronary artery

- disease: results from the AtheroGene Study. *Circ Res.* 2005; 97(5):e53–9. Epub 2005/08/16. 01. RES.0000181286.44222.61 [pii] doi: [10.1161/01.RES.0000181286.44222.61](https://doi.org/10.1161/01.RES.0000181286.44222.61) PMID: [16100045](https://pubmed.ncbi.nlm.nih.gov/16100045/).
10. Böger RH, Endres HG, Schwedhelm E, Darius H, Atzler D, Lüneburg N, et al. Asymmetric dimethylarginine as an independent risk marker for mortality in ambulatory patients with peripheral arterial disease. *J Intern Med.* 2011; 269(3):349–61. Epub 2010/12/24. doi: [10.1111/j.1365-2796.2010.02322.x](https://doi.org/10.1111/j.1365-2796.2010.02322.x) PMID: [21175900](https://pubmed.ncbi.nlm.nih.gov/21175900/).
  11. Meinitzer A, Kielstein JT, Pilz S, Drechsler C, Ritz E, Boehm BO, et al. Symmetrical and asymmetrical dimethylarginine as predictors for mortality in patients referred for coronary angiography: the Ludwigs-hafen Risk and Cardiovascular Health study. *Clin Chem.* 2011; 57(1):112–21. Epub 2010/11/03. clinchem.2010.150854 [pii] doi: [10.1373/clinchem.2010.150854](https://doi.org/10.1373/clinchem.2010.150854) PMID: [21036946](https://pubmed.ncbi.nlm.nih.gov/21036946/).
  12. Böger RH, Maas R, Schulze F, Schwedhelm E. Asymmetric dimethylarginine (ADMA) as a prospective marker of cardiovascular disease and mortality—an update on patient populations with a wide range of cardiovascular risk. *Pharmacol Res.* 2009; 60(6):481–7. Epub 2009/07/15. S1043-6618(09)00175-3 [pii] doi: [10.1016/j.phrs.2009.07.001](https://doi.org/10.1016/j.phrs.2009.07.001) PMID: [19596069](https://pubmed.ncbi.nlm.nih.gov/19596069/).
  13. Aucella F, Maas R, Vigilante M, Tripepi G, Schwedhelm E, Margaglione M, et al. Methylarginines and mortality in patients with end stage renal disease: a prospective cohort study. *Atherosclerosis.* 2009; 207(2):541–5. Epub 2009/06/09. S0021-9150(09)00406-7 [pii] doi: [10.1016/j.atherosclerosis.2009.05.011](https://doi.org/10.1016/j.atherosclerosis.2009.05.011) PMID: [19501358](https://pubmed.ncbi.nlm.nih.gov/19501358/).
  14. Zeller M, Korandji C, Guillard JC, Sicard P, Vergely C, Lorgis L, et al. Impact of asymmetric dimethylarginine on mortality after acute myocardial infarction. *Arterioscler Thromb Vasc Biol.* 2008; 28(5):954–60. Epub 2008/02/16. ATVBaha.108.162768 [pii] doi: [10.1161/ATVBaha.108.162768](https://doi.org/10.1161/ATVBaha.108.162768) PMID: [18276906](https://pubmed.ncbi.nlm.nih.gov/18276906/).
  15. Gore MO, Lüneburg N, Schwedhelm E, Ayers CR, Anderssohn M, Khera A, et al. Symmetrical dimethylarginine predicts mortality in the general population: observations from the Dallas heart study. *Arterioscler Thromb Vasc Biol.* 2013; 33(11):2682–8. Epub 2013/09/07. ATVBaha.113.301219 [pii] doi: [10.1161/ATVBaha.113.301219](https://doi.org/10.1161/ATVBaha.113.301219) PMID: [24008162](https://pubmed.ncbi.nlm.nih.gov/24008162/).
  16. Schwedhelm E, Wallaschofski H, Atzler D, Dörr M, Nauck M, Völker U, et al. Incidence of all-cause and cardiovascular mortality predicted by symmetric dimethylarginine in the population-based study of health in pomerania. *PLoS One.* 2014; 9(5):e96875. Epub 2014/05/14. [pii]. PMID: [24819070](https://pubmed.ncbi.nlm.nih.gov/24819070/); PubMed Central PMCID: [PMC4018357](https://pubmed.ncbi.nlm.nih.gov/PMC4018357/).
  17. Schwedhelm E, Böger RH. The role of asymmetric and symmetric dimethylarginines in renal disease. *Nat Rev Nephrol.* 2011; 7(5):275–85. Epub 2011/03/30. nrneph.2011.31 [pii] doi: [10.1038/nrneph.2011.31](https://doi.org/10.1038/nrneph.2011.31) PMID: [21445101](https://pubmed.ncbi.nlm.nih.gov/21445101/).
  18. Böger RH, Sullivan LM, Schwedhelm E, Wang TJ, Maas R, Benjamin EJ, et al. Plasma asymmetric dimethylarginine and incidence of cardiovascular disease and death in the community. *Circulation.* 2009; 119(12):1592–600. Epub 2009/03/18. CIRCULATIONaha.108.838268 [pii] doi: [10.1161/CIRCULATIONaha.108.838268](https://doi.org/10.1161/CIRCULATIONaha.108.838268) PMID: [19289633](https://pubmed.ncbi.nlm.nih.gov/19289633/); PubMed Central PMCID: [PMC2742491](https://pubmed.ncbi.nlm.nih.gov/PMC2742491/).
  19. Borgeraas H, Strand E, Ringdal Pedersen E, Dierkes J, Ueland PM, Seifert R, et al. Omega-3 Status and the Relationship between Plasma Asymmetric Dimethylarginine and Risk of Myocardial Infarction in Patients with Suspected Coronary Artery Disease. *Cardiol Res Pract.* 2012; 2012:201742. Epub 2013/01/25. doi: [10.1155/2012/201742](https://doi.org/10.1155/2012/201742) PMID: [23346455](https://pubmed.ncbi.nlm.nih.gov/23346455/); PubMed Central PMCID: [PMC3549394](https://pubmed.ncbi.nlm.nih.gov/PMC3549394/).
  20. Siegerink B, Maas R, Vossen CY, Schwedhelm E, Koenig W, Boger R, et al. Asymmetric and symmetric dimethylarginine and risk of secondary cardiovascular disease events and mortality in patients with stable coronary heart disease: the KAROLA follow-up study. *Clin Res Cardiol.* 2013; 102(3):193–202. Epub 2012/10/18. doi: [10.1007/s00392-012-0515-4](https://doi.org/10.1007/s00392-012-0515-4) PMID: [23073705](https://pubmed.ncbi.nlm.nih.gov/23073705/).
  21. Young JM, Terrin N, Wang X, Greene T, Beck GJ, Kusek JW, et al. Asymmetric dimethylarginine and mortality in stages 3 to 4 chronic kidney disease. *Clin J Am Soc Nephrol.* 2009; 4(6):1115–20. Epub 2009/04/25. CJN.06671208 [pii] doi: [10.2215/CJN.06671208](https://doi.org/10.2215/CJN.06671208) PMID: [19389824](https://pubmed.ncbi.nlm.nih.gov/19389824/); PubMed Central PMCID: [PMC2689879](https://pubmed.ncbi.nlm.nih.gov/PMC2689879/).
  22. Abedini S, Meinitzer A, Holme I, Marz W, Weihrauch G, Fellstrom B, et al. Asymmetrical dimethylarginine is associated with renal and cardiovascular outcomes and all-cause mortality in renal transplant recipients. *Kidney Int.* 2010; 77(1):44–50. Epub 2009/10/23. ki2009382 [pii] doi: [10.1038/ki.2009.382](https://doi.org/10.1038/ki.2009.382) PMID: [19847152](https://pubmed.ncbi.nlm.nih.gov/19847152/).
  23. Levin A, Rigatto C, Barrett B, Madore F, Muirhead N, Holmes D, et al. Biomarkers of inflammation, fibrosis, cardiac stretch and injury predict death but not renal replacement therapy at 1 year in a Canadian chronic kidney disease cohort. *Nephrol Dial Transplant.* 2014; 29(5):1037–47. Epub 2013/12/29. gft479 [pii] doi: [10.1093/ndt/gft479](https://doi.org/10.1093/ndt/gft479) PMID: [24371297](https://pubmed.ncbi.nlm.nih.gov/24371297/).
  24. Pihlstrom H, Mjoen G, Dahle DO, Pilz S, Midtvedt K, Marz W, et al. Symmetric dimethylarginine as predictor of graft loss and all-cause mortality in renal transplant recipients. *Transplantation.* 2014; 98(11):1219–25. Epub 2014/07/08. doi: [10.1097/TP.0000000000000205](https://doi.org/10.1097/TP.0000000000000205) PMID: [24999963](https://pubmed.ncbi.nlm.nih.gov/24999963/); PubMed Central PMCID: [PMC4240460](https://pubmed.ncbi.nlm.nih.gov/PMC4240460/).

25. Lajer M, Tarnow L, Jorsal A, Teerlink T, Parving HH, Rossing P. Plasma concentration of asymmetric dimethylarginine (ADMA) predicts cardiovascular morbidity and mortality in type 1 diabetic patients with diabetic nephropathy. *Diabetes Care*. 2008; 31(4):747–52. Epub 2007/12/29. doi: [10.2337/dc07-1762](https://doi.org/10.2337/dc07-1762) PMID: [18162497](https://pubmed.ncbi.nlm.nih.gov/18162497/).
26. Cavusoglu E, Ruwende C, Chopra V, Poludasu S, Yanamadala S, Frishman WH, et al. Relation of baseline plasma ADMA levels to cardiovascular morbidity and mortality at two years in men with diabetes mellitus referred for coronary angiography. *Atherosclerosis*. 2010; 210(1):226–31. Epub 2009/12/01. S0021-9150(09)00908-3 [pii] doi: [10.1016/j.atherosclerosis.2009.10.034](https://doi.org/10.1016/j.atherosclerosis.2009.10.034) PMID: [19944421](https://pubmed.ncbi.nlm.nih.gov/19944421/).
27. Nijveldt RJ, Teerlink T, Van Der Hoven B, Siroen MP, Kuik DJ, Rauwerda JA, et al. Asymmetrical dimethylarginine (ADMA) in critically ill patients: high plasma ADMA concentration is an independent risk factor of ICU mortality. *Clin Nutr*. 2003; 22(1):23–30. Epub 2003/01/30. S0261561402906138 [pii]. PMID: [12553946](https://pubmed.ncbi.nlm.nih.gov/12553946/).
28. Davis JS, Darcy CJ, Yeo TW, Jones C, McNeil YR, Stephens DP, et al. Asymmetric dimethylarginine, endothelial nitric oxide bioavailability and mortality in sepsis. *PLoS One*. 2011; 6(2):e17260. Epub 2011/03/03. doi: [10.1371/journal.pone.0017260](https://doi.org/10.1371/journal.pone.0017260) PMID: [21364995](https://pubmed.ncbi.nlm.nih.gov/21364995/); PubMed Central PMCID: [PMC3041798](https://pubmed.ncbi.nlm.nih.gov/PMC3041798/).
29. Visser M, Vermeulen MA, Richir MC, Teerlink T, Houdijk AP, Kostense PJ, et al. Imbalance of arginine and asymmetric dimethylarginine is associated with markers of circulatory failure, organ failure and mortality in shock patients. *Br J Nutr*. 2012; 107(10):1458–65. Epub 2011/12/02. S0007114511004648 [pii] doi: [10.1017/S0007114511004648](https://doi.org/10.1017/S0007114511004648) PMID: [22129964](https://pubmed.ncbi.nlm.nih.gov/22129964/).
30. Willeit P, Freitag DF, Laukkanen JA, Chowdhury S, Gobin R, Mayr M, et al. Asymmetric dimethylarginine and cardiovascular risk: systematic review and meta-analysis of 22 prospective studies. *J Am Heart Assoc*. 2015; 4(6):e001833. Epub 2015/05/30. JAHA.115.001833 [pii] doi: [10.1161/JAHA.115.001833](https://doi.org/10.1161/JAHA.115.001833) PMID: [26021436](https://pubmed.ncbi.nlm.nih.gov/26021436/); PubMed Central PMCID: [PMC4599532](https://pubmed.ncbi.nlm.nih.gov/PMC4599532/).
31. Moher D, Liberati A, Tetzlaff J, Altman DG. Preferred reporting items for systematic reviews and meta-analyses: the PRISMA statement. *J Clin Epidemiol*. 2009; 62(10):1006–12. Epub 2009/07/28. S0895-4356(09)00179-6 [pii] doi: [10.1016/j.jclinepi.2009.06.005](https://doi.org/10.1016/j.jclinepi.2009.06.005) PMID: [19631508](https://pubmed.ncbi.nlm.nih.gov/19631508/).
32. Koch A, Weiskirchen R, Bruensing J, Dücker H, Buendgens L, Kunze J, et al. Regulation and prognostic relevance of symmetric dimethylarginine serum concentrations in critical illness and sepsis. *Mediators Inflamm*. 2013; 2013:413826. Epub 2013/08/13. doi: [10.1155/2013/413826](https://doi.org/10.1155/2013/413826) PMID: [23935249](https://pubmed.ncbi.nlm.nih.gov/23935249/); PubMed Central PMCID: [PMC3712234](https://pubmed.ncbi.nlm.nih.gov/PMC3712234/).
33. Ari H, Ari S, Erdogan E, Tiryakioglu O, Huysal K, Koca V, et al. The effects of endothelial dysfunction and inflammation on slow coronary flow. *Turk Kardiyol Dern Ars*. 2010; 38(5):327–33. Epub 2011/01/05. PMID: [21200102](https://pubmed.ncbi.nlm.nih.gov/21200102/).
34. Koch A, Weiskirchen R, Kunze J, Dücker H, Bruensing J, Buendgens L, et al. Elevated asymmetric dimethylarginine levels predict short- and long-term mortality risk in critically ill patients. *J Crit Care*. 2013; 28(6):947–53. Epub 2013/08/21. S0883-9441(13)00141-X [pii] doi: [10.1016/j.jcrc.2013.05.016](https://doi.org/10.1016/j.jcrc.2013.05.016) PMID: [23953490](https://pubmed.ncbi.nlm.nih.gov/23953490/).
35. Kodama S, Saito K, Tanaka S, Maki M, Yachi Y, Asumi M, et al. Cardiorespiratory fitness as a quantitative predictor of all-cause mortality and cardiovascular events in healthy men and women: a meta-analysis. *JAMA*. 2009; 301(19):2024–35. Epub 2009/05/21. 301/19/2024 [pii] doi: [10.1001/jama.2009.681](https://doi.org/10.1001/jama.2009.681) PMID: [19454641](https://pubmed.ncbi.nlm.nih.gov/19454641/).
36. Skoro-Sajer N, Mittermayer F, Panzenboeck A, Bonderman D, Sadushi R, Hitsch R, et al. Asymmetric dimethylarginine is increased in chronic thromboembolic pulmonary hypertension. *Am J Respir Crit Care Med*. 2007; 176(11):1154–60. Epub 2007/09/18. 200702-278OC [pii] doi: [10.1164/rccm.200702-278OC](https://doi.org/10.1164/rccm.200702-278OC) PMID: [17872491](https://pubmed.ncbi.nlm.nih.gov/17872491/).
37. Anderssohn M, Rosenberg M, Schwedhelm E, Zugck C, Lutz M, Luneburg N, et al. The L-Arginine-asymmetric dimethylarginine ratio is an independent predictor of mortality in dilated cardiomyopathy. *J Card Fail*. 2012; 18(12):904–11. Epub 2012/12/05. S1071-9164(12)01288-2 [pii] doi: [10.1016/j.cardfail.2012.10.011](https://doi.org/10.1016/j.cardfail.2012.10.011) PMID: [23207078](https://pubmed.ncbi.nlm.nih.gov/23207078/).
38. Plicner D, Mazur P, Sadowski J, Undas A. Asymmetric dimethylarginine and oxidative stress following coronary artery bypass grafting: associations with postoperative outcome. *Eur J Cardiothorac Surg*. 2014; 45(5):e136–41. Epub 2014/02/14. ezt646 [pii] doi: [10.1093/ejcts/ezt646](https://doi.org/10.1093/ejcts/ezt646) PMID: [24523493](https://pubmed.ncbi.nlm.nih.gov/24523493/).
39. Danesh J, Collins R, Appleby P, Peto R. Association of fibrinogen, C-reactive protein, albumin, or leukocyte count with coronary heart disease: meta-analyses of prospective studies. *JAMA*. 1998; 279(18):1477–82. Epub 1998/05/26. jma80001 [pii]. PMID: [9600484](https://pubmed.ncbi.nlm.nih.gov/9600484/).
40. Orsini N, Li R, Wolk A, Khudyakov P, Spiegelman D. Meta-analysis for linear and nonlinear dose-response relations: examples, an evaluation of approximations, and software. *Am J Epidemiol*. 2012; 175(1):66–73. doi: [10.1093/aje/kwr265](https://doi.org/10.1093/aje/kwr265) PMID: [22135359](https://pubmed.ncbi.nlm.nih.gov/22135359/); PubMed Central PMCID: [PMC3244608](https://pubmed.ncbi.nlm.nih.gov/PMC3244608/).

41. Greenland S, Longnecker MP. Methods for trend estimation from summarized dose-response data, with applications to meta-analysis. *Am J Epidemiol.* 1992; 135(11):1301–9. PMID: [1626547](#).
42. Chene G, Thompson SG. Methods for summarizing the risk associations of quantitative variables in epidemiologic studies in a consistent form. *Am J Epidemiol.* 1996; 144(6):610–21. Epub 1996/09/15. PMID: [8797521](#).
43. Aune D, Greenwood DC, Chan DS, Vieira R, Vieira AR, Navarro Rosenblatt DA, et al. Body mass index, abdominal fatness and pancreatic cancer risk: a systematic review and non-linear dose-response meta-analysis of prospective studies. *Ann Oncol.* 2012; 23(4):843–52. Epub 2011/09/06. mdr398 [pii] doi: [10.1093/annonc/mdr398](#) PMID: [21890910](#).
44. Drew DA, Tighiouart H, Scott T, Kantor A, Fan L, Artusi C, et al. Asymmetric dimethylarginine, race, and mortality in hemodialysis patients. *Clin J Am Soc Nephrol.* 2014; 9(8):1426–33. Epub 2014/06/28. C.JN.00770114 [pii] doi: [10.2215/CJN.00770114](#) PMID: [24970872](#); PubMed Central PMCID: PMC4123389.
45. Mittermayer F, Krzyzanowska K, Exner M, Mlekusch W, Amighi J, Sabeti S, et al. Asymmetric dimethylarginine predicts major adverse cardiovascular events in patients with advanced peripheral artery disease. *Arterioscler Thromb Vasc Biol.* 2006; 26(11):2536–40. Epub 2006/08/26. 01. ATV.0000242801.38419.48 [pii] doi: [10.1161/01.ATV.0000242801.38419.48](#) PMID: [16931791](#).
46. Schulze F, Carter AM, Schwedhelm E, Ajjan R, Maas R, von Holten RA, et al. Symmetric dimethylarginine predicts all-cause mortality following ischemic stroke. *Atherosclerosis.* 2010; 208(2):518–23. Epub 2009/08/25. S0021-9150(09)00599-1 [pii] doi: [10.1016/j.atherosclerosis.2009.06.039](#) PMID: [19700158](#).
47. Aune D, Chan DS, Lau R, Vieira R, Greenwood DC, Kampman E, et al. Dietary fibre, whole grains, and risk of colorectal cancer: systematic review and dose-response meta-analysis of prospective studies. *BMJ.* 2011; 343:d6617. Epub 2011/11/15. PMID: [22074852](#); PubMed Central PMCID: PMC3213242. doi: [10.1136/bmj.d6617](#)
48. Ben Q, Sun Y, Chai R, Qian A, Xu B, Yuan Y. Dietary fiber intake reduces risk for colorectal adenoma: a meta-analysis. *Gastroenterology.* 2014; 146(3):689–99 e6. doi: [10.1053/j.gastro.2013.11.003](#) PMID: [24216326](#).
49. Durrleman S, Simon R. Flexible regression models with cubic splines. *Stat Med.* 1989; 8(5):551–61. PMID: [2657958](#).
50. Lu TM, Ding YA, Lin SJ, Lee WS, Tai HC. Plasma levels of asymmetrical dimethylarginine and adverse cardiovascular events after percutaneous coronary intervention. *Eur Heart J.* 2003; 24(21):1912–9. Epub 2003/10/31. S0195668X03005694 [pii]. PMID: [14585249](#).
51. Ravani P, Tripepi G, Malberti F, Testa S, Mallamaci F, Zoccali C. Asymmetrical dimethylarginine predicts progression to dialysis and death in patients with chronic kidney disease: a competing risks modeling approach. *J Am Soc Nephrol.* 2005; 16(8):2449–55. Epub 2005/06/10. ASN.2005010076 [pii] doi: [10.1681/ASN.2005010076](#) PMID: [15944335](#).
52. Busch M, Fleck C, Wolf G, Stein G. Asymmetrical (ADMA) and symmetrical dimethylarginine (SDMA) as potential risk factors for cardiovascular and renal outcome in chronic kidney disease—possible candidates for paradoxical epidemiology? *Amino Acids.* 2006; 30(3):225–32. Epub 2006/05/09. doi: [10.1007/s00726-005-0268-8](#) PMID: [16680555](#).
53. Maas R, Schulze F, Baumert J, Löwel H, Hamraz K, Schwedhelm E, et al. Asymmetric dimethylarginine, smoking, and risk of coronary heart disease in apparently healthy men: prospective analysis from the population-based Monitoring of Trends and Determinants in Cardiovascular Disease/Kooperative Gesundheitsforschung in der Region Augsburg study and experimental data. *Clin Chem.* 2007; 53(4):693–701. Epub 2007/02/24. clinchem.2006.081893 [pii] doi: [10.1373/clinchem.2006.081893](#) PMID: [17317881](#).
54. Nicholls SJ, Wang Z, Koeth R, Levison B, Delfraino B, Dzavik V, et al. Metabolic profiling of arginine and nitric oxide pathways predicts hemodynamic abnormalities and mortality in patients with cardiogenic shock after acute myocardial infarction. *Circulation.* 2007; 116(20):2315–24. Epub 2007/10/31. CIRCULATIONAHA.107.693986 [pii] doi: [10.1161/CIRCULATIONAHA.107.693986](#) PMID: [17967979](#).
55. Leong T, Zylberstein D, Graham I, Lissner L, Ward D, Fogarty J, et al. Asymmetric dimethylarginine independently predicts fatal and nonfatal myocardial infarction and stroke in women: 24-year follow-up of the population study of women in Gothenburg. *Arterioscler Thromb Vasc Biol.* 2008; 28(5):961–7. Epub 2008/02/23. ATVB.107.156596 [pii] doi: [10.1161/ATVB.107.156596](#) PMID: [18292394](#).
56. Wilson Tang WH, Tong W, Shrestha K, Wang Z, Levison BS, Delfraino B, et al. Differential effects of arginine methylation on diastolic dysfunction and disease progression in patients with chronic systolic heart failure. *Eur Heart J.* 2008; 29(20):2506–13. Epub 2008/08/09. ehn360 [pii] doi: [10.1093/eurheartj/ehn360](#) PMID: [18687662](#); PubMed Central PMCID: PMC2567021.

57. Cavusoglu E, Ruwende C, Chopra V, Yanamadala S, Eng C, Pinsky DJ, et al. Relationship of baseline plasma ADMA levels to cardiovascular outcomes at 2 years in men with acute coronary syndrome referred for coronary angiography. *Coron Artery Dis*. 2009; 20(2):112–7. Epub 2009/02/26. doi: [10.1097/MCA.0b013e328323982f](https://doi.org/10.1097/MCA.0b013e328323982f) PMID: [19240644](https://pubmed.ncbi.nlm.nih.gov/19240644/).
58. Kiechl S, Lee T, Santer P, Thompson G, Tsimikas S, Egger G, et al. Asymmetric and symmetric dimethylarginines are of similar predictive value for cardiovascular risk in the general population. *Atherosclerosis*. 2009; 205(1):261–5. Epub 2008/12/23. S0021-9150(08)00775-2 [pii] doi: [10.1016/j.atherosclerosis.2008.10.040](https://doi.org/10.1016/j.atherosclerosis.2008.10.040) PMID: [19100547](https://pubmed.ncbi.nlm.nih.gov/19100547/).
59. Wang Z, Tang WH, Cho L, Brennan DM, Hazen SL. Targeted metabolomic evaluation of arginine methylation and cardiovascular risks: potential mechanisms beyond nitric oxide synthase inhibition. *Arterioscler Thromb Vasc Biol*. 2009; 29(9):1383–91. Epub 2009/06/23. ATVB.AHA.109.185645 [pii] doi: [10.1161/ATVB.AHA.109.185645](https://doi.org/10.1161/ATVB.AHA.109.185645) PMID: [19542023](https://pubmed.ncbi.nlm.nih.gov/19542023/); PubMed Central PMCID: [PMC2755199](https://pubmed.ncbi.nlm.nih.gov/PMC2755199/).
60. Ari H, Ari S, Erdogan E, Tiryakioglu O, Ustundag Y, Huysal K, et al. A novel predictor of restenosis and adverse cardiac events: asymmetric dimethylarginine. *Heart Vessels*. 2010; 25(1):19–26. Epub 2010/01/22. doi: [10.1007/s00380-009-1158-x](https://doi.org/10.1007/s00380-009-1158-x) PMID: [20091394](https://pubmed.ncbi.nlm.nih.gov/20091394/).
61. Shi B, Ni Z, Zhou W, Yu Z, Gu L, Mou S, et al. Circulating levels of asymmetric dimethylarginine are an independent risk factor for left ventricular hypertrophy and predict cardiovascular events in pre-dialysis patients with chronic kidney disease. *Eur J Intern Med*. 2010; 21(5):444–8. Epub 2010/09/08. S0953-6205(10)00141-X [pii] doi: [10.1016/j.ejim.2010.07.001](https://doi.org/10.1016/j.ejim.2010.07.001) PMID: [20816602](https://pubmed.ncbi.nlm.nih.gov/20816602/).
62. Yeo TW, Lampah DA, Tjitra E, Gitawati R, Darcy CJ, Jones C, et al. Increased asymmetric dimethylarginine in severe falciparum malaria: association with impaired nitric oxide bioavailability and fatal outcome. *PLoS Pathog*. 2010; 6(4):e1000868. Epub 2010/04/28. doi: [10.1371/journal.ppat.1000868](https://doi.org/10.1371/journal.ppat.1000868) PMID: [20421938](https://pubmed.ncbi.nlm.nih.gov/20421938/); PubMed Central PMCID: [PMC2858698](https://pubmed.ncbi.nlm.nih.gov/PMC2858698/).
63. Lu TM, Chung MY, Lin MW, Hsu CP, Lin SJ. Plasma asymmetric dimethylarginine predicts death and major adverse cardiovascular events in individuals referred for coronary angiography. *Int J Cardiol*. 2011; 153(2):135–40. Epub 2011/07/29. S0167-5273(11)00677-2 [pii] doi: [10.1016/j.ijcard.2011.06.120](https://doi.org/10.1016/j.ijcard.2011.06.120) PMID: [21794936](https://pubmed.ncbi.nlm.nih.gov/21794936/).
64. Tripepi G, Mattace Raso F, Sijbrands E, Seck MS, Maas R, Boger R, et al. Inflammation and asymmetric dimethylarginine for predicting death and cardiovascular events in ESRD patients. *Clin J Am Soc Nephrol*. 2011; 6(7):1714–21. Epub 2011/06/07. CJN.11291210 [pii] doi: [10.2215/CJN.11291210](https://doi.org/10.2215/CJN.11291210) PMID: [21642364](https://pubmed.ncbi.nlm.nih.gov/21642364/).
65. Cavalca V, Veglia F, Squellerio I, De Metrio M, Rubino M, Porro B, et al. Circulating levels of dimethylarginines, chronic kidney disease and long-term clinical outcome in non-ST-elevation myocardial infarction. *PLoS One*. 2012; 7(11):e48499. Epub 2012/11/28. doi: [10.1371/journal.pone.0048499](https://doi.org/10.1371/journal.pone.0048499) PONE-D-12-17620 [pii]. PMID: [23185262](https://pubmed.ncbi.nlm.nih.gov/23185262/); PubMed Central PMCID: [PMC3501498](https://pubmed.ncbi.nlm.nih.gov/PMC3501498/).
66. Hsu CP, Lin SJ, Chung MY, Lu TM. Asymmetric dimethylarginine predicts clinical outcomes in ischemic chronic heart failure. *Atherosclerosis*. 2012; 225(2):504–10. Epub 2012/10/25. S0021-9150(12)00658-2 [pii] doi: [10.1016/j.atherosclerosis.2012.09.040](https://doi.org/10.1016/j.atherosclerosis.2012.09.040) PMID: [23092827](https://pubmed.ncbi.nlm.nih.gov/23092827/).
67. Zairis MN, Patsourakos NG, Tsiaousis GZ, Theodossis Georgilas A, Melidonis A, Makrygiannis SS, et al. Plasma asymmetric dimethylarginine and mortality in patients with acute decompensation of chronic heart failure. *Heart*. 2012; 98(11):860–4. Epub 2012/03/17. heartjnl-2011-301372 [pii] doi: [10.1136/heartjnl-2011-301372](https://doi.org/10.1136/heartjnl-2011-301372) PMID: [22422591](https://pubmed.ncbi.nlm.nih.gov/22422591/).
68. Ignjatovic AM, Cvetkovic TP, Pavlovic RM, Dordevic VM, Milosevic ZG, Dordevic VB, et al. Endothelial dysfunction, inflammation and malnutrition markers as predictors of mortality in dialysis patients: multi-marker approach. *Int Urol Nephrol*. 2013; 45(6):1715–24. Epub 2013/04/18. doi: [10.1007/s11255-013-0439-6](https://doi.org/10.1007/s11255-013-0439-6) PMID: [23591722](https://pubmed.ncbi.nlm.nih.gov/23591722/).
69. Pizzarelli F, Maas R, Dattolo P, Tripepi G, Michelassi S, D'Arrigo G, et al. Asymmetric dimethylarginine predicts survival in the elderly. *Age (Dordr)*. 2013; 35(6):2465–75. Epub 2013/04/16. doi: [10.1007/s11357-013-9523-1](https://doi.org/10.1007/s11357-013-9523-1) PMID: [23584888](https://pubmed.ncbi.nlm.nih.gov/23584888/); PubMed Central PMCID: [PMC3824988](https://pubmed.ncbi.nlm.nih.gov/PMC3824988/).
70. Yilmaz MI, Demirkaya E, Acikel C, Saldır M, Akar S, Cayci T, et al. Endothelial function in patients with familial Mediterranean fever-related amyloidosis and association with cardiovascular events. *Rheumatology (Oxford)*. 2014; 53(11):2002–8. Epub 2014/06/08. keu231 [pii] doi: [10.1093/rheumatology/keu231](https://doi.org/10.1093/rheumatology/keu231) PMID: [24907154](https://pubmed.ncbi.nlm.nih.gov/24907154/).
71. Lopez A, Lorente JA, Steingrub J, Bakker J, McLuckie A, Willatts S, et al. Multiple-center, randomized, placebo-controlled, double-blind study of the nitric oxide synthase inhibitor 546C88: effect on survival in patients with septic shock. *Crit Care Med*. 2004; 32(1):21–30. Epub 2004/01/07. doi: [10.1097/01.CCM.0000105581.01815.C6](https://doi.org/10.1097/01.CCM.0000105581.01815.C6) PMID: [14707556](https://pubmed.ncbi.nlm.nih.gov/14707556/).
72. Maas R, Dentz L, Schwedhelm E, Thoms W, Kuss O, Hiltmeyer N, et al. Elevated plasma concentrations of the endogenous nitric oxide synthase inhibitor asymmetric dimethylarginine predict adverse events in patients undergoing noncardiac surgery. *Crit Care Med*. 2007; 35(8):1876–81. Epub 2007/06/22. doi: [10.1097/01.CCM.0000277038.11630.71](https://doi.org/10.1097/01.CCM.0000277038.11630.71) PMID: [17581491](https://pubmed.ncbi.nlm.nih.gov/17581491/).



73. Lambden S, Kelly P, Ahmetaj-Shala B, Wang Z, Lee B, Nandi M, et al. Dimethylarginine dimethylaminohydrolase 2 regulates nitric oxide synthesis and hemodynamics and determines outcome in polymicrobial sepsis. *Arterioscler Thromb Vasc Biol.* 2015; 35(6):1382–92. Epub 2015/04/11. ATVBHA.115.305278 [pii] doi: [10.1161/ATVBHA.115.305278](https://doi.org/10.1161/ATVBHA.115.305278) PMID: [25857313](https://pubmed.ncbi.nlm.nih.gov/25857313/).
74. Kielstein JT, Salpeter SR, Bode-Böger SM, Cooke JP, Fliser D. Symmetric dimethylarginine (SDMA) as endogenous marker of renal function—a meta-analysis. *Nephrol Dial Transplant.* 2006; 21(9):2446–51. Epub 2006/06/13. gfl292 [pii] doi: [10.1093/ndt/gfl292](https://doi.org/10.1093/ndt/gfl292) PMID: [16766542](https://pubmed.ncbi.nlm.nih.gov/16766542/).
75. Schwedhelm E. Quantification of ADMA: analytical approaches. *Vasc Med.* 2005; 10 Suppl 1:S89–95. Epub 2006/02/01. PMID: [16444874](https://pubmed.ncbi.nlm.nih.gov/16444874/).
76. Lüneburg N, Xanthakis V, Schwedhelm E, Sullivan LM, Maas R, Anderssohn M, et al. Reference intervals for plasma L-arginine and the L-arginine:asymmetric dimethylarginine ratio in the Framingham Offspring Cohort. *J Nutr.* 2011; 141(12):2186–90. Epub 2011/10/28. jn.111.148197 [pii] doi: [10.3945/jn.111.148197](https://doi.org/10.3945/jn.111.148197) PMID: [22031661](https://pubmed.ncbi.nlm.nih.gov/22031661/); PubMed Central PMCID: [PMC3223876](https://pubmed.ncbi.nlm.nih.gov/PMC3223876/).
77. Atzler D, Schwedhelm E, Nauck M, Ittermann T, Böger RH, Friedrich N. Serum reference intervals of homoarginine, ADMA, and SDMA in the study of health in Pomerania. *Clin Chem Lab Med.* 2014; 52(12):1835–42. Epub 2014/06/20. doi: [10.1515/cclm-2014-0314](https://doi.org/10.1515/cclm-2014-0314) /j/cclm.ahead-of-print/cclm-2014-0314/cclm-2014-0314.xml [pii]. PMID: [24945429](https://pubmed.ncbi.nlm.nih.gov/24945429/).
78. Schwedhelm E, Xanthakis V, Maas R, Sullivan LM, Schulze F, Riederer U, et al. Asymmetric dimethylarginine reference intervals determined with liquid chromatography-tandem mass spectrometry: results from the Framingham offspring cohort. *Clin Chem.* 2009; 55(8):1539–45. Epub 2009/06/23. clinchem.2009.124263 [pii] doi: [10.1373/clinchem.2009.124263](https://doi.org/10.1373/clinchem.2009.124263) PMID: [19541865](https://pubmed.ncbi.nlm.nih.gov/19541865/); PubMed Central PMCID: [PMC3794429](https://pubmed.ncbi.nlm.nih.gov/PMC3794429/).
79. Schwedhelm E, Xanthakis V, Maas R, Sullivan LM, Atzler D, Lüneburg N, et al. Plasma symmetric dimethylarginine reference limits from the Framingham offspring cohort. *Clin Chem Lab Med.* 2011; 49(11):1907–10. Epub 2011/08/26. doi: [10.1515/CCLM.2011.679](https://doi.org/10.1515/CCLM.2011.679) PMID: [21864208](https://pubmed.ncbi.nlm.nih.gov/21864208/); PubMed Central PMCID: [PMC3235736](https://pubmed.ncbi.nlm.nih.gov/PMC3235736/).
80. Vasan RS. Biomarkers of cardiovascular disease: molecular basis and practical considerations. *Circulation.* 2006; 113(19):2335–62. Epub 2006/05/17. 113/19/2335 [pii] doi: [10.1161/CIRCULATIONAHA.104.482570](https://doi.org/10.1161/CIRCULATIONAHA.104.482570) PMID: [16702488](https://pubmed.ncbi.nlm.nih.gov/16702488/).
81. Hlatky MA, Greenland P, Arnett DK, Ballantyne CM, Criqui MH, Elkind MS, et al. Criteria for evaluation of novel markers of cardiovascular risk: a scientific statement from the American Heart Association. *Circulation.* 2009; 119(17):2408–16. Epub 2009/04/15. CIRCULATIONAHA.109.192278 [pii] doi: [10.1161/CIRCULATIONAHA.109.192278](https://doi.org/10.1161/CIRCULATIONAHA.109.192278) PMID: [19364974](https://pubmed.ncbi.nlm.nih.gov/19364974/); PubMed Central PMCID: [PMC2956982](https://pubmed.ncbi.nlm.nih.gov/PMC2956982/).
82. Maas R. Pharmacotherapies and their influence on asymmetric dimethylarginine (ADMA). *Vasc Med.* 2005; 10 Suppl 1:S49–57. Epub 2006/02/01. PMID: [16444869](https://pubmed.ncbi.nlm.nih.gov/16444869/).
83. Böger RH. The pharmacodynamics of L-arginine. *J Nutr.* 2007; 137(6 Suppl 2):1650S–5S. Epub 2007/05/22. 137/6/1650S [pii]. PMID: [17513442](https://pubmed.ncbi.nlm.nih.gov/17513442/).
84. Schulman SP, Becker LC, Kass DA, Champion HC, Terrin ML, Forman S, et al. L-arginine therapy in acute myocardial infarction: the Vascular Interaction With Age in Myocardial Infarction (VINTAGE MI) randomized clinical trial. *JAMA.* 2006; 295(1):58–64. Epub 2006/01/05. 295/1/58 [pii] doi: [10.1001/jama.295.1.58](https://doi.org/10.1001/jama.295.1.58) PMID: [16391217](https://pubmed.ncbi.nlm.nih.gov/16391217/).
85. Morales Y, Caceres T, May K, Hevel JM. Biochemistry and regulation of the protein arginine methyltransferases (PRMTs). *Arch Biochem Biophys.* 2016; 590:138–52. doi: [10.1016/j.abb.2015.11.030](https://doi.org/10.1016/j.abb.2015.11.030) PMID: [26612103](https://pubmed.ncbi.nlm.nih.gov/26612103/).
86. Maas R, Tan-Andreesen J, Schwedhelm E, Schulze F, Böger RH. A stable-isotope based technique for the determination of dimethylarginine dimethylaminohydrolase (DDAH) activity in mouse tissue. *J Chromatogr B Analyt Technol Biomed Life Sci.* 2007; 851(1–2):220–8. doi: [10.1016/j.jchromb.2007.01.020](https://doi.org/10.1016/j.jchromb.2007.01.020) PMID: [17296339](https://pubmed.ncbi.nlm.nih.gov/17296339/).
87. Shirakawa T, Kako K, Shimada T, Nagashima Y, Nakamura A, Ishida J, et al. Production of free methylarginines via the proteasome and autophagy pathways in cultured cells. *Mol Med Rep.* 2011; 4(4):615–20. doi: [10.3892/mmr.2011.488](https://doi.org/10.3892/mmr.2011.488) PMID: [21584492](https://pubmed.ncbi.nlm.nih.gov/21584492/).
88. Strobel J, Mieth M, Endress B, Auge D, König J, Fromm MF, et al. Interaction of the cardiovascular risk marker asymmetric dimethylarginine (ADMA) with the human cationic amino acid transporter 1 (CAT1). *J Mol Cell Cardiol.* 2012; 53(3):392–400. Epub 2012/06/19. S0022-2828(12)00214-3 [pii] doi: [10.1016/j.yjmcc.2012.06.002](https://doi.org/10.1016/j.yjmcc.2012.06.002) PMID: [22705145](https://pubmed.ncbi.nlm.nih.gov/22705145/).
89. McDermott JR. Studies on the catabolism of Ng-methylarginine, Ng, Ng-dimethylarginine and Ng, Ng-dimethylarginine in the rabbit. *Biochem J.* 1976; 154(1):179–84. PMID: [1275907](https://pubmed.ncbi.nlm.nih.gov/1275907/); PubMed Central PMCID: [PMC1172690](https://pubmed.ncbi.nlm.nih.gov/PMC1172690/).

90. Ogawa T, Kimoto M, Watanabe H, Sasaoka K. Metabolism of NG,NG-and NG,N'G-dimethylarginine in rats. *Arch Biochem Biophys*. 1987; 252(2):526–37. PMID: [3101600](#).
91. Caplin B, Wang Z, Slaviero A, Tomlinson J, Dowsett L, Delahaye M, et al. Alanine-glyoxylate aminotransferase-2 metabolizes endogenous methylarginines, regulates NO, and controls blood pressure. *Arterioscler Thromb Vasc Biol*. 2012; 32(12):2892–900. doi: [10.1161/ATVBAHA.112.254078](#) PMID: [23023372](#).
92. Ronden RA, Houben AJ, Teerlink T, Bakker JA, Bierau J, Stehouwer CD, et al. Reduced renal plasma clearance does not explain increased plasma asymmetric dimethylarginine in hypertensive subjects with mild to moderate renal insufficiency. *Am J Physiol Renal Physiol*. 2012; 303(1):F149–56. doi: [10.1152/ajprenal.00045.2012](#) PMID: [22552932](#).
93. Carello KA, Whitesall SE, Lloyd MC, Billecke SS, D'Alecy LG. Asymmetrical dimethylarginine plasma clearance persists after acute total nephrectomy in rats. *Am J Physiol Heart Circ Physiol*. 2006; 290(1):H209–16. doi: [10.1152/ajpheart.00208.2005](#) PMID: [16113067](#).
94. Martens-Lobenhoffer J, Bode-Boger SM. Amino acid N-acetylation: metabolic elimination of symmetric dimethylarginine as symmetric N(alpha)-acetyldimethylarginine, determined in human plasma and urine by LC-MS/MS. *J Chromatogr B Analyt Technol Biomed Life Sci*. 2015; 975:59–64. doi: [10.1016/j.jchromb.2014.11.009](#) PMID: [25438244](#).
95. Jiang JL, Wang S, Li NS, Zhang XH, Deng HW, Li YJ. The inhibitory effect of simvastatin on the ADMA-induced inflammatory reaction is mediated by MAPK pathways in endothelial cells. *Biochem Cell Biol*. 2007; 85(1):66–77. doi: [10.1139/o06-146](#) PMID: [17464346](#).
96. Bode-Boger SM, Scalera F, Kielstein JT, Martens-Lobenhoffer J, Breithardt G, Fobker M, et al. Symmetrical dimethylarginine: a new combined parameter for renal function and extent of coronary artery disease. *J Am Soc Nephrol*. 2006; 17(4):1128–34. doi: [10.1681/ASN.2005101119](#) PMID: [16481412](#).
97. Schepers E, Barreto DV, Liabeuf S, Glorieux G, Eloot S, Barreto FC, et al. Symmetric dimethylarginine as a proinflammatory agent in chronic kidney disease. *Clin J Am Soc Nephrol*. 2011; 6(10):2374–83. doi: [10.2215/CJN.01720211](#) PMID: [21817129](#); PubMed Central PMCID: [PMC3359555](#).
98. Schepers E, Glorieux G, Dhondt A, Leybaert L, Vanholder R. Role of symmetric dimethylarginine in vascular damage by increasing ROS via store-operated calcium influx in monocytes. *Nephrol Dial Transplant*. 2009; 24(5):1429–35. doi: [10.1093/ndt/gfn670](#) PMID: [19059932](#).
99. Speer T, Rohrer L, Blyszczuk P, Shroff R, Kuschnerus K, Krankel N, et al. Abnormal high-density lipoprotein induces endothelial dysfunction via activation of Toll-like receptor-2. *Immunity*. 2013; 38(4):754–68. doi: [10.1016/j.immuni.2013.02.009](#) PMID: [23477738](#).
