# Supplementary material for: Asymmetric and Symmetric Dimethylarginine as Risk Markers for Total Mortality and Cardiovascular Outcomes: A Systematic Review and Meta-Analysis of Prospective Studies
Source: PubMed Central journal article supplement (PMC5094762; doi:10.1371/journal.pone.0165811), 2016-11-03
Supplement: pone.0165811.s002.pdf [file pone.0165811.s002.pdf]

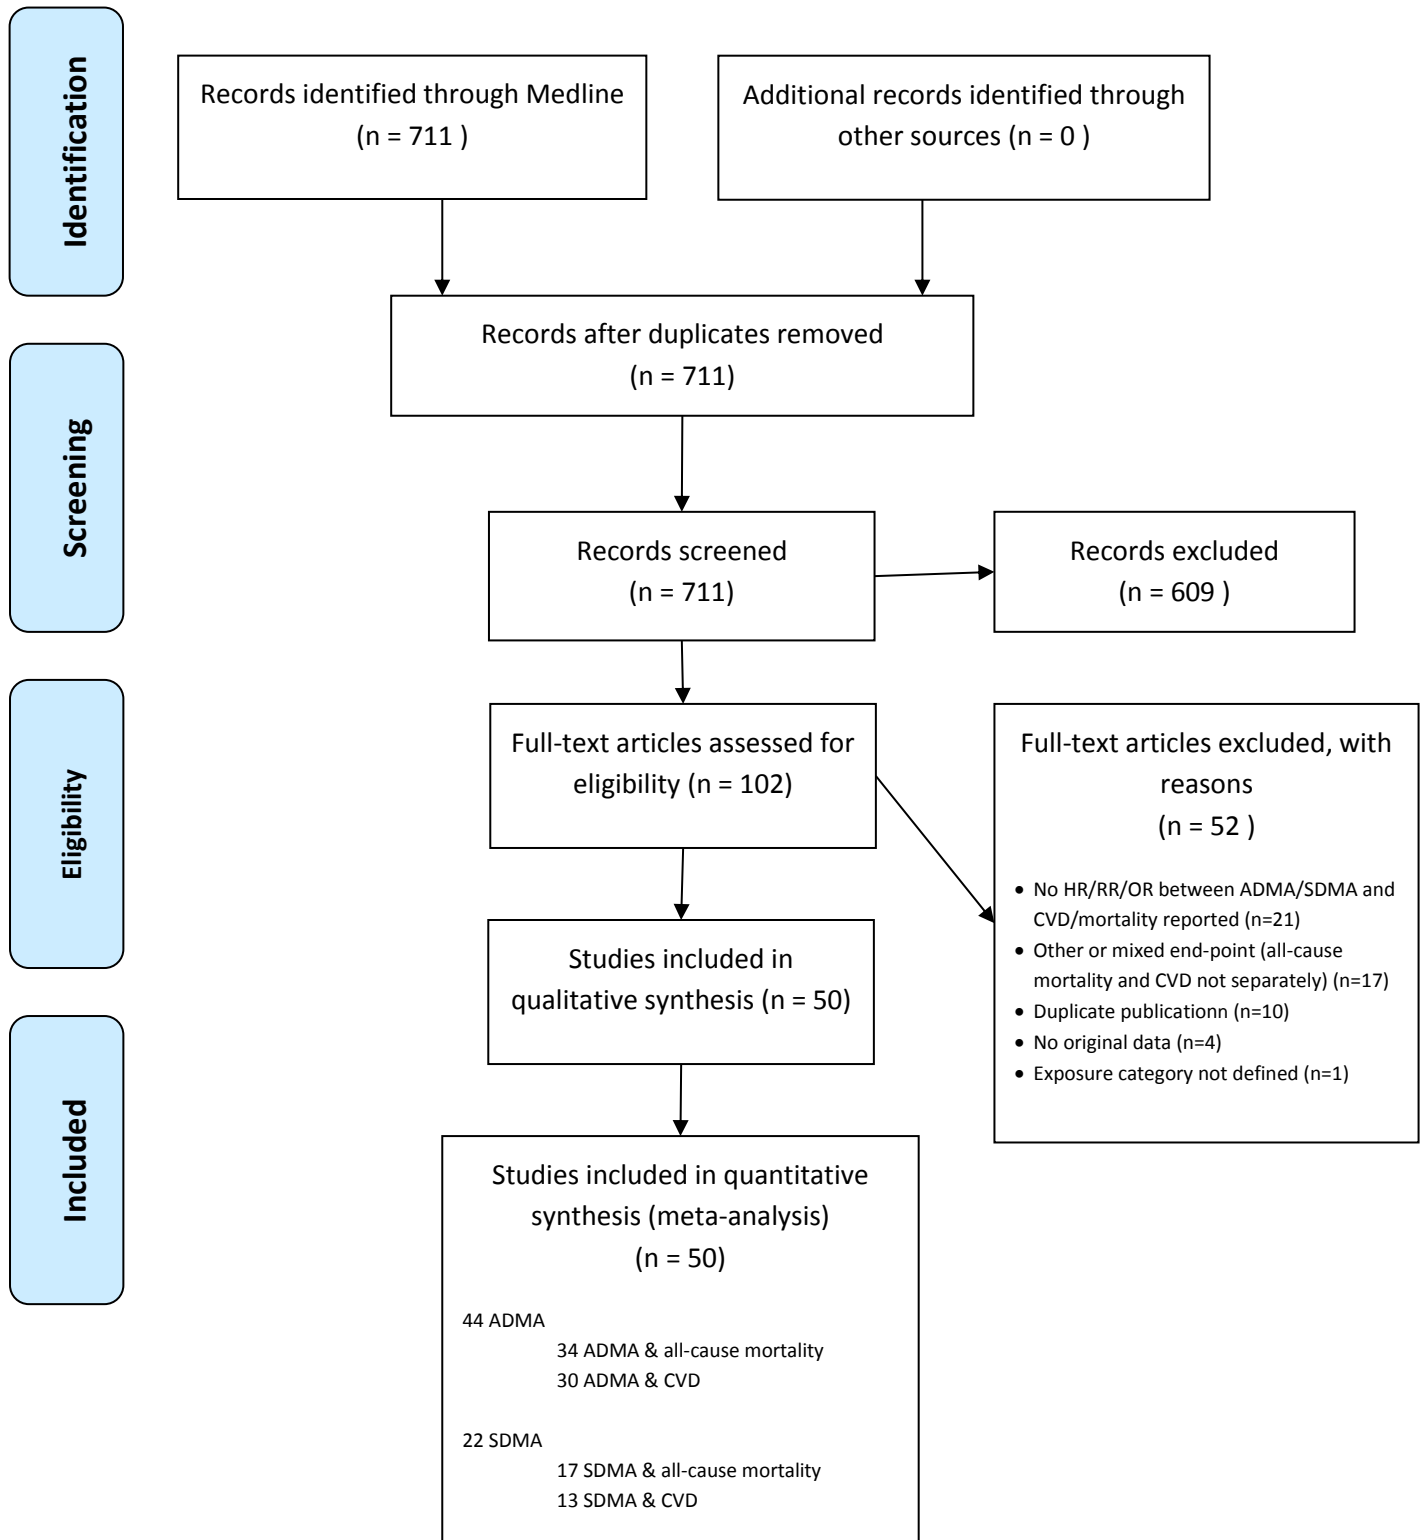

**S2 Figure:** Flowchart of study selection for the meta-analysis
